# The South American Journal of Herpetology

## A Post-hurricane Quantitative Assessment of the Red-bellied Racer (*Alsophis rufiventris*) on Saba and Comparison with St. Eustatius

--Manuscript Draft--

|                                                      |                                                                                                                                                                                                                                                                                                                                                                                                                                                                                                                                                                                                                                                                                                                                                                                                                                                                                                                                                                                                                                                                                                                                                                                                                                                                                                                                                                                                                                                                                                                                                      |
|------------------------------------------------------|------------------------------------------------------------------------------------------------------------------------------------------------------------------------------------------------------------------------------------------------------------------------------------------------------------------------------------------------------------------------------------------------------------------------------------------------------------------------------------------------------------------------------------------------------------------------------------------------------------------------------------------------------------------------------------------------------------------------------------------------------------------------------------------------------------------------------------------------------------------------------------------------------------------------------------------------------------------------------------------------------------------------------------------------------------------------------------------------------------------------------------------------------------------------------------------------------------------------------------------------------------------------------------------------------------------------------------------------------------------------------------------------------------------------------------------------------------------------------------------------------------------------------------------------------|
| <b>Manuscript Number:</b>                            |                                                                                                                                                                                                                                                                                                                                                                                                                                                                                                                                                                                                                                                                                                                                                                                                                                                                                                                                                                                                                                                                                                                                                                                                                                                                                                                                                                                                                                                                                                                                                      |
| <b>Full Title:</b>                                   | A Post-hurricane Quantitative Assessment of the Red-bellied Racer ( <i>Alsophis rufiventris</i> ) on Saba and Comparison with St. Eustatius                                                                                                                                                                                                                                                                                                                                                                                                                                                                                                                                                                                                                                                                                                                                                                                                                                                                                                                                                                                                                                                                                                                                                                                                                                                                                                                                                                                                          |
| <b>Article Type:</b>                                 | Article                                                                                                                                                                                                                                                                                                                                                                                                                                                                                                                                                                                                                                                                                                                                                                                                                                                                                                                                                                                                                                                                                                                                                                                                                                                                                                                                                                                                                                                                                                                                              |
| <b>Keywords:</b>                                     | Abundance; Caribbean; Density; Distance; Island; Occupancy; Snake; Survival                                                                                                                                                                                                                                                                                                                                                                                                                                                                                                                                                                                                                                                                                                                                                                                                                                                                                                                                                                                                                                                                                                                                                                                                                                                                                                                                                                                                                                                                          |
| <b>Corresponding Author:</b>                         | Hannah Madden, MSc<br>Caribbean Netherlands Science Institute<br>St. Eustatius, NETHERLANDS ANTILLES                                                                                                                                                                                                                                                                                                                                                                                                                                                                                                                                                                                                                                                                                                                                                                                                                                                                                                                                                                                                                                                                                                                                                                                                                                                                                                                                                                                                                                                 |
| <b>Corresponding Author Secondary Information:</b>   |                                                                                                                                                                                                                                                                                                                                                                                                                                                                                                                                                                                                                                                                                                                                                                                                                                                                                                                                                                                                                                                                                                                                                                                                                                                                                                                                                                                                                                                                                                                                                      |
| <b>Corresponding Author's Institution:</b>           | Caribbean Netherlands Science Institute                                                                                                                                                                                                                                                                                                                                                                                                                                                                                                                                                                                                                                                                                                                                                                                                                                                                                                                                                                                                                                                                                                                                                                                                                                                                                                                                                                                                                                                                                                              |
| <b>Corresponding Author's Secondary Institution:</b> |                                                                                                                                                                                                                                                                                                                                                                                                                                                                                                                                                                                                                                                                                                                                                                                                                                                                                                                                                                                                                                                                                                                                                                                                                                                                                                                                                                                                                                                                                                                                                      |
| <b>First Author:</b>                                 | Hannah Madden, MSc                                                                                                                                                                                                                                                                                                                                                                                                                                                                                                                                                                                                                                                                                                                                                                                                                                                                                                                                                                                                                                                                                                                                                                                                                                                                                                                                                                                                                                                                                                                                   |
| <b>First Author Secondary Information:</b>           |                                                                                                                                                                                                                                                                                                                                                                                                                                                                                                                                                                                                                                                                                                                                                                                                                                                                                                                                                                                                                                                                                                                                                                                                                                                                                                                                                                                                                                                                                                                                                      |
| <b>Order of Authors:</b>                             | Hannah Madden, MSc<br>Lara Mielke, MSc                                                                                                                                                                                                                                                                                                                                                                                                                                                                                                                                                                                                                                                                                                                                                                                                                                                                                                                                                                                                                                                                                                                                                                                                                                                                                                                                                                                                                                                                                                               |
| <b>Order of Authors Secondary Information:</b>       |                                                                                                                                                                                                                                                                                                                                                                                                                                                                                                                                                                                                                                                                                                                                                                                                                                                                                                                                                                                                                                                                                                                                                                                                                                                                                                                                                                                                                                                                                                                                                      |
| <b>Abstract:</b>                                     | <p>We estimated occupancy, abundance (<math>\lambda</math>), detection probability, density/ha and abundance of a regionally endemic snake in the Colubrid family on the Dutch Caribbean island of Saba in 2021, four years after hurricanes Irma and Maria impacted the island. Line transect surveys were conducted at 74 sites covering 6.7 ha. The proportion of sites occupied was estimated at 0.74 (min 0.48, max 0.90), with occupancy varying between vegetation types and across elevational gradients. Similarly, <math>\lambda</math> was estimated at 1.61 (min 0.7, max 3.7) but varied between vegetation types and elevational gradients. Detection probability was estimated at 0.15 (min 0.10, max 0.21). Using Distance sampling, we estimated 10.9 (min 7.3, max 16.2) racers/ha, with a total population estimate of 4,917 (min 2,577, max 6,362) across the entire study region (438.6 ha.) Based on anecdotal observations from Saba residents and prior literature describing the pre-hurricane population as "abundant" (at least 2.0 racers/hour), we posit that the population experienced a hurricane-induced decline but may have since recovered, though not to previous levels (1.28 racers/hour). Nevertheless, our results suggest that racer densities on Saba are currently higher than those on St. Eustatius. Despite this, given the species' extremely limited extant range and the presence of invasive species on both islands, prevention of local extirpation should be a high conservation priority.</p> |

bioRxiv preprint doi: <https://doi.org/10.1101/2021.11.15.468688>; this version posted November 17, 2021. The copyright holder for this preprint (which was not certified by peer review) is the author/funder. All rights reserved. No reuse allowed without permission.

## **A Post-hurricane Quantitative Assessment of the Red-bellied Racer (*Alsophis***

### ***rufiventris*) on Saba and Comparison with St. Eustatius**

Hannah Madden<sup>1,2\*</sup>, Lara Mielke<sup>3,4</sup>

<sup>1\*</sup> Caribbean Netherlands Science Institute (CNSI), P.O. Box 65, St. Eustatius, Caribbean Netherlands.

<sup>2\*</sup> NIOZ Royal Netherlands Institute for Sea Research, and Utrecht University, P.O. Box 59, 1790 AB Den Burg, Texel, the Netherlands.

<sup>3</sup> Saba Conservation Foundation, The Bottom, Saba, Caribbean Netherlands.

<sup>4</sup> Ecological Professionals Foundation, Rosemary Lane 49, St. Eustatius, Caribbean Netherlands.

\*Corresponding author. Email: [Hannah.madden@cnsi.nl](mailto:Hannah.madden@cnsi.nl)

ABSTRACT.---We estimated occupancy, abundance ( $\lambda$ ), detection probability, density/ha and abundance of a regionally endemic snake in the Colubrid family on the Dutch Caribbean island of Saba in 2021, four years after hurricanes Irma and Maria impacted the island. Line transect surveys were conducted at 74 sites covering 6.7 ha. The proportion of sites occupied was estimated at 0.74 (min 0.48, max 0.90), with occupancy varying between vegetation types and across elevational gradients. Similarly,  $\lambda$  was estimated at 1.61 (min 0.7, max 3.7) but varied between vegetation types and elevational gradients. Detection probability was estimated at 0.15 (min 0.10, max 0.21). Using Distance sampling, we estimated 10.9 (min 7.3, max 16.2) racers/ha, with a total population estimate of 4,917 (min 2,577, max 6,362) across the entire study region (438.6 ha.) Based on anecdotal observations from Saban residents and prior literature describing the pre-hurricane population as “abundant” (at least 2.0 racers/hour), we posit that the population experienced a hurricane-induced decline but may have since recovered, though not to previous levels (1.28 racers/hour). Nevertheless, our results suggest that racer densities on Saba are currently higher than those on St. Eustatius. Despite this, given the species’ extremely limited extant range and

1  
2  
3  
4  
5  
6  
7  
8  
9  
10  
11  
12  
13  
14  
15  
16  
17  
18  
19  
20  
21  
22  
23  
24  
25  
26  
27  
28  
29  
30  
31  
32  
33  
34  
35  
36  
37  
38  
39  
40  
41  
42  
43  
44  
45  
46  
47  
48  
49  
50  
51  
52  
53  
54  
55  
56  
57  
58  
59  
60  
61  
62  
63  
64  
65

the presence of invasive species on both islands, prevention of local extirpation should be a high conservation priority.

Key words: Abundance, Caribbean, Density, Distance, Island, Occupancy, Snake, Survival.

## INTRODUCTION

Reptile populations in the tropics are influenced by island size (Ricklefs and Lovette 1999), elevation (Fauth et al., 1989; Ricklefs and Lovette, 1999), geography (Moser et al., 2018), topography (Ricklefs and Lovette 1999) and vegetation structure (Herrera-Montes and Brokaw 2010). Furthermore, reptiles face a multitude of threats, including but not limited to predation by invasive species (Gibbons et al., 2000), habitat disturbance/loss (Mayani-Parás et al., 2019), human disturbance/persecution (Alves et al., 2012; Atwood et al., 2020), and climate change (Urban, 2015). In the Caribbean, hurricanes in particular are predicted to increase in frequency and severity by the end of the 21<sup>st</sup> century (Webster et al., 2005; Bender et al., 2010). The impacts of increased hurricane activity and severity on reptile populations are as yet unknown, and as stated by Powell (2004), “we can only guess at changes resulting from .... the impact of hurricanes on populations occupying increasingly smaller parcels of suitable habitats”.

The Caribbean Region is a biodiversity hotspot due to its high levels of species endemism (Mittermeier et al., 2004); unfortunately, their limited geographic ranges makes species more vulnerable to extinction from local impacts (e.g., habitat loss, invasive species; Catford et al., 2012). The Caribbean Netherlands volcanic island of Saba (13 km<sup>2</sup>) is dominated by a single dormant volcano, Mount Scenery, which reaches a maximum elevation

1 of 870m above sea level. The climate at lower elevations is described as tropical savannah,  
2  
3 whereas the upper slopes of Mount Scenery are characterized as a tropical rainforest climate  
4  
5 (de Freitas et al., 2016). The island's complex topography has created a variety of vegetation  
6  
7 types that are influenced by changes in wind, sun, and rain exposure (de Freitas et al., 2016).  
8  
9 Vegetation on the western side of Saba is predominantly deciduous forest, the mid-latitude  
10  
11 southern side of the mountain is tropical rainforest, and the northeastern side is herbaceous  
12  
13 rangeland (Stoffers, 1956). However, Saba's natural vegetation has changed extensively since  
14  
15 it was first described by Stoffers (1956). These changes are thought to be attributed to  
16  
17 hurricane impacts, natural succession due to reduced agricultural activity, and invasive  
18  
19 species (de Freitas et al., 2016). In September 2017 two category 5 hurricanes (Irma and  
20  
21 Maria) struck the Windward Islands, causing extensive damage to forests on Saba. Tree stems  
22  
23 were defoliated, branches were lost, and average mortality was estimated at 18% (Eppinga  
24  
25 and Pucko, 2018). Natural systems are thought to require decades to recover from the impacts  
26  
27 of a category 5 hurricane (Lugo, 2000). Studies on the impacts of hurricanes on wildlife  
28  
29 populations in the tropics are generally lacking (but see Rivera-Milán et al., 2021; Madden et  
30  
31 al., 2021; van den Burg et al., 2021).  
32  
33  
34  
35  
36  
37  
38  
39  
40

41 West Indian racers in the family Colubridae occur throughout the Lesser Antilles but  
42  
43 are in rapid decline (Henderson, 1992, 2004; Powell and Henderson, 2005). Racers (*Alsophis*  
44  
45 spp.) are predominantly ground-dwelling, diurnal (but see Madden, 2020 and Questel, 2021),  
46  
47 oviparous species that are susceptible to invasive predators such as black rats (*Rattus rattus*  
48  
49 Linnaeus, 1758), domestic cats (*Felis catus* Linnaeus, 1758) and mongooses (*Herpestes*  
50  
51 *javanicus* Geoffroy Saint-Hilaire, 1818; Daltry et al., 1997; Powell, 2006; Debrot et al.,  
52  
53 2014). Racers are especially vulnerable as they can invoke (irrational) fear among humans,  
54  
55 leading to persecution, and due to habitat degradation (Powell, 2006). For a brief overview of  
56  
57  
58  
59  
60  
61  
62  
63  
64  
65

*Alsophis* spp. in the Caribbean and a full description of the current status of *Alsophis*

*rufiventris* (Duméril, Bibron and Duméril, 1854) on St. Eustatius, see Madden et al. (2021).

Quantitative assessments of racers are generally lacking (but see Daltry et al., 2017 and Hileman et al., 2017), as highlighted by Madden et al. (2021), and to our knowledge, only one study has quantified the effects of hurricanes on *A. rufiventris* on St. Eustatius (Madden et al., 2021). Specifically, the authors documented a significant decline in encounter rates of *A. rufiventris* on St. Eustatius (16.0 snakes/hr in 2011 compared to 0.34/hr in 2018 and 0.41/hr in 2019) as a result of hurricanes Irma and Maria. While no systematic pre-hurricane data exist from Saba, Sajdak and Henderson (1991) stated that “population density at higher altitudes (>500 m) on Saba was the greatest of any racer population we have seen”. Similarly, Daltry et al. (1997) described the racer as “more abundant on Saba than St. Eustatius (e.g. one racer was seen every thirty minutes whilst walking along paths through the Saban rainforest, whereas sightings in St Eustatius occurred much less frequently”). However, the authors stressed the importance of recognizing natural seasonal variations in apparent abundance of the species. Mating is thought to commence in March, whereby males would be more active and thus more readily detected. Racer populations are also thought to fluctuate with rainfall patterns (Daltry et al., 1997). The species was previously described as “thriving” on Saba (and St. Eustatius), where it was common even in urban areas (Henderson, 2004; Maley et al., 2006). Thus, if pre-hurricane racer populations were indeed higher on Saba than St. Eustatius, we might assume that Daltry et al.’s (1997) count of 2/hr was a significant under-estimation. This study aims to rectify the lack of quantitative assessments of the racer on Saba by providing occupancy, lambda, detection probability, density and abundance estimates of the population within a specific stratum.

## METHODS

### Study Area

Our study took place on Saba (17°37'N, 63°14' W), Caribbean Netherlands, a small (13 km<sup>2</sup>) island with a human population of approximately 1,933 (CBS 2021) located approximately 30.6 km north-east of St. Eustatius (Fig. 1). Temperature typically ranges from 24 to 31°C. Average annual rainfall is 760.5 mm, with the upper slopes of Mount Scenery receiving >2,000 mm per year (Veenenbos, 1955; de Freitas et al., 2016).

### Post-hurricane Surveys

Between July and September 2021 we surveyed racers in six vegetation types on Saba (total survey area 6.7 ha). To maximize detection and minimize disturbance, all surveys were conducted along existing hiking trails. Using the existing network of trails allowed us to survey racers in an otherwise steep topographical environment with, at times, rocks or dense vegetation. We conducted surveys along 100 m line transects by looking and listening for *A. rufiventris* while walking at a very slow pace. All transect surveys were conducted between 0800 and 1800 hrs. Upon detection, the perpendicular distance of the snake from the center of the transect was measured with a tape measure. Elevation (m) was measured with a handheld GPS.

**Habitat descriptions.** We conducted fieldwork in six habitat types based on vegetation descriptions by de Freitas et al. (2016; Fig. 2): M1 (*Heliconia-Charianthus* Mountains; the highest parts of Mount Scenery, 770-870m), M2 (*Philodendron-Marcgravia* Mountains; the lower slopes of Mount Scenery, 360-860m), M3 (*Philodendron-Inga* Mountains; hilltops around Mount Scenery, 110-810m), M4 (*Swietenia* Mountains; lower western slope of Mount

Scenery, 2-270m), M6 (*Coccoloba-Inga* Mountains; south-west side of Saba, 3-550m), and M7 (*Aristida-Bothriochloa* Mountains, 0-500m).

## STATISTICAL ANALYSES

We used a likelihood-based, single-season occupancy model (MacKenzie et al., 2017) in the package ‘wiqid’ (Meredith, 2020). We followed the methods described by Madden et al. (2021) to obtain estimates of site occupancy ( $\hat{\psi}$ ) in relation to habitat and elevation, average number of individuals per sample, lambda ( $\hat{\lambda}$ ), and sampling detection probability ( $\hat{p}$ ). We also used the package ‘Rdistance’ (McDonald et al., 2019) to obtain density ( $\hat{D}$ /ha) and abundance ( $\hat{N}$ ) estimates of racers on Saba and St. Eustatius (in the latter case by pooling two years’ of data, which provided annual estimates) across both survey regions (458.6 ha on Saba and 540 ha on St. Eustatius). Due to the very small number of detections on each island it was not possible to separate the data into smaller strata (e.g., vegetation types). Distance sampling is based on estimation of a detection function,  $\hat{g}(x)$ , which for line transects decreases with distance  $x$  and is required to estimate detection probability of individuals or clusters of individuals in the survey region (Buckland et al. 2001, 2015). Following exploratory data analysis (Buckland et al. 2001, 2015), we right truncated the distance data ( $w = 2.5$  m) and estimated detection probability of available individuals and clusters. We assessed the fit of uniform, half-normal, and hazard-rate detection models with goodness of fit tests (e.g., Kolmogorov-Smirnov test  $D_n$ ,  $P < 0.05$ ); and we ranked the resulting models using Akaike Information Criterion (AIC) for stepwise model selection (Buckland et al., 2001, 2015, Marques et al. 2007). We used nonparametric bootstrapping (500 simulations) to estimate

detection probability standard errors (Efron and Tibshirani, 1993, Buckland et al., 2001, 2015). All analyses were performed in the R environment version 4.0.3.

## RESULTS

### Post-hurricane Survey Population Size

We conducted surveys between 4 July and 28 September 2021, four years after Hurricanes Irma and Maria, surveying an area of 6.7 ha in six vegetation types. Average transect length was  $100.55 \pm \text{SD } 5.72$  m. Line transects were repeated a minimum of four and a maximum of 12 times at different sites. Average survey time per transect was  $5.50 \pm 2.73$  minutes. We detected a total of 56 racers during surveys.

Occupancy modeling revealed  $\hat{p} = 0.15$  (min 0.10, max 0.21), which increased to 0.17 (min 0.08, max 0.31) when a racer was previously detected. Average  $\hat{\psi} = 0.74$  (min 0.48, max 0.90), with estimates varying between habitats (Fig. 3) and increasing in line with elevation (Fig. 4). Our  $\hat{\psi}$  estimate is similar to estimates obtained from St. Eustatius (0.73 in 2018, 0.65 in 2019; Madden et al. 2021), however  $\hat{p}$  is higher than on St. Eustatius (0.05 in 2018 and 0.07 in 2019; Madden et al. 2021). Occupancy varied across the six habitats sampled, being highest in M1 (peak of Mount Scenery) and lowest in M7 (*Aristida-Bothriochloa* Mountains), though we note the wide 95% confidence intervals for each habitat type, some of which encompass each other. Average  $\hat{\lambda}$  was 1.61 (min 0.70, max 3.67), with estimates varying between habitats (some with very wide and overlapping CIs; Fig. 5) and increasing in line with elevation (Fig. 6), although  $\hat{\lambda}$  declines steeply above 800m. Estimated encounter rate was 1.28/hr. Mean  $\hat{\lambda}$  was similar to estimates from St. Eustatius (1.82 in 2018 and 1.60 in 2019). Our raw encounter rate of 1.28/hr is higher than estimates from St. Eustatius (0.34 and



1  
2  
3  
4  
5  
6  
7  
8  
9  
0.41/hr) but lower than the pre-hurricane estimate of 16.0 snakes/hr (Madden et al., 2021), as  
11 well as Daltry et al.'s (1997) estimate of 2/hr from Saba. Similarly, our density estimate from  
12 Saba of 10.9/ha is higher than those from St. Eustatius (9.9/ha in 2018 and 7.3 in 2019).

13  
14  
15  
16  
17  
18  
19  
20  
21  
22  
23  
24  
25  
26  
27  
28  
29  
30  
31  
32  
33  
34  
35  
36  
37  
38  
39  
40  
41  
42  
43  
44  
45  
46  
47  
48  
49  
50  
51  
52  
53  
54  
55  
56  
57  
58  
59  
60  
61  
62  
63  
64  
65  
Using the uniform model with cosine adjustment (Cramer von Mises test:  $P = 0.22$ ),  
Distance analysis of transect data from Saba revealed  $\hat{D}/\text{ha} = 10.9$  (min 7.3, max 16.2), or  $\hat{N} =$   
4,917 (min 2,577, max 6,362; CV 20.5%) across the entire survey region (438.6 ha). Using  
the hazard rate model with no adjustment (Cramer von Mises test:  $P = 0.72$ ), Distance  
analysis of transect data from St. Eustatius in 2018 revealed  $\hat{D}/\text{ha} = 9.9$  (min 6.6, max 14.7),  
or  $\hat{N} = 5,328$  (min 3,582, max 7,924; CV 20.2%) across the entire survey region (540 ha).  
Distance analysis of transect data from St. Eustatius in 2019 revealed  $\hat{D}/\text{ha} = 7.3$  (min 5.1,  
max 10.3), or  $\hat{N} = 3,915$  (min 2,769, max 5,535; CV 17.7%).

## DISCUSSION

Due to their secretive nature and cryptic behavior, snakes are among the most difficult  
vertebrates to study in their native habitats (Durso et al., 2011). On Guam, for example,  $\hat{p}$  of  
the brown tree snake (*Boiga irregularis* Bechstein, 1802) is just 0.07 (Christy et al., 2010).  
We present the first quantitative assessment of *A. rufiventris* on Saba, one of just two islands  
where this species remains (Saba and St. Eustatius represent 10.9% of the species' original  
range; Sajdak and Henderson, 1991). Our results suggest that racers are present in varying  
densities across the habitats surveyed, and are also present in other habitats on Saba (LM,  
pers. obs.; K. Wulf, J. Johnson and M. Terpstra, pers. comm.). Although pre-hurricane data  
are lacking from Saba, density estimates of *Alsophis antiguae* (Parker, 1933) from Great Bird  
Island (20.2/ha; Daltry et al., 2017) and *Borikenophis portoricensis* (Reinhardt and Lütken,

1  
2  
3  
4  
5  
6  
7  
8  
9  
10  
11  
12  
13  
14  
15  
16  
17  
18  
19  
20  
21  
22  
23  
24  
25  
26  
27  
28  
29  
30  
31  
32  
33  
34  
35  
36  
37  
38  
39  
40  
41  
42  
43  
44  
45  
46  
47  
48  
49  
50  
51  
52  
53  
54  
55  
56  
57  
58  
59  
60  
61  
62  
63  
64  
65

1862) on Guana Island, British Virgin Islands (19/ha; Hileman et al., 2017) may be representative of a ‘healthy’ racer population on islands such as Saba and St. Eustatius (Hileman et al. even believe their abundance estimate may be underestimated due to the small sample size). In an earlier study, Rodda et al. (2001) surveyed *B. portoricensis* on Guana, where they estimated a density of 50/ha in early successional (*Leucaena leucocephala*) forest habitat, and even suggested this was an underestimate. However, surveys of the St. Lucia Racer (*Erythrolamprus ornatus* Garman, 1887) on Maria Major Island resulted in an estimate of just 8.6/ha (Ross and Williams, 2012), thus racer densities are likely to be species- and habitat-specific. Madden et al. (2021) provided racer density estimates of *A. rufiventris* on St. Eustatius of 9.2/ha (pre-hurricane) and 4.6/ha to 5.0/ha (post-hurricane), which differ from our current estimates. Moreover, Henderson (1992) argues that mongoose-free islands with high human population densities (e.g., Guadeloupe) support higher racer densities compared to those with lower human densities, where in most cases mongoose predation has led to extirpation of the species (e.g., Nevis and Antigua). This is supported by Hileman et al. (2017) who note the abundance of racers on mongoose-free islands.

Our 2021 raw encounter rate is higher than post-hurricane estimates from St. Eustatius but lower than the pre-hurricane estimate from 2011 (Madden et al., 2021), as well as Daltry et al.’s (1997) estimate from Saba (which was based on just a few days’ of fieldwork in March and may not be comparable). Similarly, the higher density estimate from Saba compared to St. Eustatius may be attributed to the fact that surveys on Saba were conducted four years post-hurricane, allowing for recovery of the population; nevertheless, our current density estimate is likely lower than pre-hurricane densities. Unfortunately no data exist to support this speculation and we are cognizant of the limited sample sizes from Saba and St. Eustatius, which limited our ability to produce density and abundance estimates for the

1 different habitats and produced results with levels of precision that are only just considered  
2 acceptable (Conquest, 1983). However, Daltry et al. (2017) state that *A. antiguae* can reach  
3 high densities, even on small islands, and historical anecdotal observations from Saba confirm  
4 this. We note that vegetation types on Saba differ from those on St. Eustatius, and that the  
5 understory on Saba is denser at higher elevations (LM, pers. obs.). De Freitas et al. (2016)  
6 confirm this by comparing vegetation types on Saba, showing that average vegetation cover is  
7 highest (94 %) on the top of Mount Scenery (M1- *Heliconia-Charienthus* Mountains) due to a  
8 dense shrub and herb layer while herbs are usually scarce in areas at lower elevations (M4 -  
9 *Swietenia* Mountains).  
10  
11  
12  
13  
14  
15  
16  
17  
18  
19  
20  
21  
22  
23

24 Our results from Saba are consistent with those found by Madden et al. (2021) on St.  
25 Eustatius, which suggest that sites are more likely to be occupied at higher elevations  
26 (especially >400m). Similarly, mean abundance is predicted to increase in line with elevation,  
27 however this drops sharply >800m. Many reptile species have narrowly distributed  
28 elevational ranges (Chettri et al., 2010), primarily due to the physiological response of reptiles  
29 to temperature (Fu et al., 2007). It may be that the peak of Mount Scenery on Saba, which  
30 often ‘snags’ clouds (Powell 2006), is less favorable to racers than habitats at lower  
31 elevations, which is supported by Sajdak and Henderson (1991) who did not find racers above  
32 830m. We did not survey any habitats below 100m and as such are unable to comment on the  
33 density, occupancy or abundance of racers in these areas, however published and anecdotal  
34 observations exist of snakes in urban areas (often killed by road vehicles) and in coastal areas  
35 (e.g., Sajdak and Henderson, 1991; Terpstra et al., 2015; LM pers. obs.).  
36  
37  
38  
39  
40  
41  
42  
43  
44  
45  
46  
47  
48  
49  
50  
51  
52  
53  
54  
55

56 Besides natural disasters, invasive species are cited as a major threat to racers in the  
57 genus (Daltry et al., 1997; Powell, 2006). Although Saba (and St. Eustatius) are mongoose-  
58  
59  
60  
61  
62  
63  
64  
65

1  
2  
3  
4  
5  
6  
7  
8  
9  
10  
11  
12  
13  
14  
15  
16  
17  
18  
19  
20  
21  
22  
23  
24  
25  
26  
27  
28  
29  
30  
31  
32  
33  
34  
35  
36  
37  
38  
39  
40  
41  
42  
43  
44  
45  
46  
47  
48  
49  
50  
51  
52  
53  
54  
55  
56  
57  
58  
59  
60  
61  
62  
63  
64  
65

free, both islands have been invaded by black rats and house mice (*Mus musculus* Linnaeus, 1758; Madden et al., 2019, 2020), as well as free-roaming cats and dogs (Rojer 1997). While abundance and distribution data of invasive rodents are lacking from Saba, the impact of cats on the island's globally significant population of Red-billed Tropicbirds (*Phaethon aethereus* Linnaeus, 1758) is well documented (Debrot et al., 2004; Terpstra et al., 2015; Boeken, 2016). Debrot et al. (2014) estimated 285 cats/km<sup>2</sup> at one coastal colony based on scat density (1.1% of which contained racers), after which a localized cat removal program was initiated to conserve Tropicbird chicks. No racers were found in the euthanized cats' stomach contents ( $N = 17$ ), but live racers were documented at the nest colony via camera traps; black rats were also detected in the same area (Terpstra et al., 2015). We are especially concerned about the impacts of free-roaming domestic cats on Saba, where four incidents of racer predation were documented (Fig. 7; LM and B. Noort, pers. obs.) within two weeks.

Despite its small size, Saba supports a number of (regionally) endemic reptile species, including the recently described *Iguana melanoderma* (Breuil et al., 2020), *A. rufiventris* and the endemic *Anolis sabanus* (Garman, 1887), whose population was previously estimated at around seven million individuals (Staats and Schall, 1996). This anole is widely distributed in almost all habitats across the island, described as abundant from sea level to the top of Mount Scenery, and rare only in very dry areas (Lazell, 1972; Rojer, 1997). Anoles and frogs (*Eleutherodactylus johnstonei* Barbour, 1914), which are abundant on Saba and St. Eustatius and whose ranges overlap extensively, form an important food source for the racer (Henderson and Sajdak, 1996). Quantitative data on the impacts of hurricanes on these species are lacking from Saba and St. Eustatius, but studies on other *Anolis* species in the Neotropics have demonstrated that hurricanes can drive natural selection (Donihue et al., 2018, 2020; Dufour et al., 2019). Moreover, the limited landmasses of both islands combined with

ongoing habitat destruction/loss and increased hurricanes forces reptile populations into

increasingly smaller patches of suitable habitat (Powell 2004). We therefore stress the need to continue monitoring in order to gain a better understanding of temporal trends in *A. rufiventris* populations on both islands, especially considering the ongoing threat of invasive species and the very real risk of another destructive hurricane in the near future (Elsner, 2006).

## ACKNOWLEDGEMENTS

We are grateful to the Saba Conservation Foundation for allowing us to conduct racer surveys on Saba in 2021. We greatly appreciate fieldwork assistance by Tom Wijers and Jasper Bleijenberg. We also thank Kevin Verdel and James Johnson who provided useful practical advice on conducting fieldwork.

## REFERENCES

- Alves R.R.N., Vieira K.S., Santana G.G., Vieira W.L.S., Almeida W.O., Souto W.M.S., Montenegro P.F.G.P., Pezzuti J.C.B. 2012. A review on human attitudes towards reptiles in Brazil. *Environmental Monitoring and Assessment* 184:6877-6901.
- Atwood T.B., Valentine S.A., Hammill E., McCauley D.J., Madin E.M., Beard K.H. Pearse W.D. 2020. Herbivores at the highest risk of extinction among mammals, birds, and reptiles. *Science advances* 6:p.eabb8458.

1  
2  
3  
4  
5  
6  
7  
8  
9  
10  
11  
12  
13  
14  
15  
16  
17  
18  
19  
20  
21  
22  
23  
24  
25  
26  
27  
28  
29  
30  
31  
32  
33  
34  
35  
36  
37  
38  
39  
40  
41  
42  
43  
44  
45  
46  
47  
48  
49  
50  
51  
52  
53  
54  
55  
56  
57  
58  
59  
60  
61  
62  
63  
64  
65

Barbour T. 1914. A contribution to the Zoogeography of the West Indies, with special reference to amphibians and reptiles. *Memoirs of the Museum of Comparative Zoology* 44:209-359.

Bechstein J. M. 1802. Herrn de Lacépède's Naturgeschichte der Amphibien oder der eyerlegenden vierfüssigen Thiere und der Schlangen. *Eine Fortsetzung von Buffon's Naturgeschichte aus dem Französischen übersetzt und mit Anmerkungen und Zusätzen versehen*. Weimar: Industrie Comptoir.

Bender M.A., Knutson T.R., Tuleya R.E. et al. 2010. Modeled Impact of Anthropogenic Warning on the Frequency of Intense Atlantic Hurricanes. *Science* 327:454-458.

Boeken M. 2016. Breeding success of Red-billed Tropicbirds *Phaethon aethereus* on the Caribbean island of Saba. *Ardea* 104:263-271.

Breuil M., Schikorski D., Vuillaume B., Krauss U., Morton M.N., Corry E., Bech N., Jelić M., Grandjean F. 2020. Painted black: *Iguana melanoderma* (Reptilia, Squamata, Iguanidae) a new melanistic endemic species from Saba and Montserrat islands (Lesser Antilles). *ZooKeys* 926:95.

Buckland S.T., Anderson D.R., Burnham K.P., Laake J.L., Borchers D.L., Thomas L. 2001. Introduction to distance sampling: estimating abundance of biological populations. Oxford University Press, Oxford, UK.

1  
2  
3  
4  
5  
6  
7  
8  
9  
10  
11  
12  
13  
14  
15  
16  
17  
18  
19  
20  
21  
22  
23  
24  
25  
26  
27  
28  
29  
30  
31  
32  
33  
34  
35  
36  
37  
38  
39  
40  
41  
42  
43  
44  
45  
46  
47  
48  
49  
50  
51  
52  
53  
54  
55  
56  
57  
58  
59  
60  
61  
62  
63  
64  
65

Buckland S.T., Rexstad E.A., Marques T.A., Oedekoven, C.S. 2015. *Distance sampling: methods and applications* (Vol. 431). New York, NY, USA: Springer.

Catford J.A., Vesk P.A., Richardson D.M., Pyšek P. 2012. Quantifying levels of biological invasion: towards the objective classification of invaded and invisable ecosystems. *Global Change Biology* 18:44-62. <https://doi.org/10.1111/j.1365-2486.2011.02549.x>

Central Bureau of Statistics. 2021. Caribbean Netherlands; population; sex, age, marital status. <https://www.cbs.nl/en-gb/figures/detail/83698ENG?dl=FB7D>. Accessed 21 October 2021.

Chettri B., Bhupathy S., Acharya B.K. 2010. Distribution pattern of reptiles along an eastern Himalayan elevation gradient, India. *Acta Oecologica* 36:16-22.

Christy M.T., Yackel Adams A.A., Rodda G.H., Savidge J.A., Tyrrell C.L. 2010. Modelling detection probabilities to evaluate management and control tools for an invasive species. *Journal of Applied Ecology* 47:106-113.

Conquest L.L. 1983. Assessing the statistical effectiveness of ecological experiments: utility of the coefficient of variation. *International Journal of Environmental Studies* 20:209-221.

Daltry J.C., Day M., Ford N. 1997. Red-bellied Racer conservation project. Conservation status of the Red-bellied Racer. Fauna & Flora International, unpublished report.

Daltry J.C., Lindsay K., Lawrence S.N., Morton M.N., Otto A., Thibou A. 2017. Successful reintroduction of the Critically Endangered Antiguan racer *Alsophis antiguae* to offshore islands in Antigua, West Indies. *International Zoo Yearbook* 51:97-106.

1  
2 Debrot A.O., Ruijter M., Enderwin W., van Hooft P., Wulf K. 2014. Predation threats to the  
3  
4 Red-billed Tropicbird breeding colony of Saba: focus on cats (No. C011/14). IMARES,  
5  
6 unpublished report.  
7  
8  
9

10  
11 de Freitas J.A., Rojer A.C., Nijhof B.S.J., Debrot A.O. 2016. A landscape ecological  
12  
13 vegetation map of Saba (Lesser Antilles). Wageningen, IMARES Wageningen UR  
14  
15 (University & Research Centre), IMARES, unpublished report C195/15. 48 pp.; 7 tab.  
16  
17  
18  
19  
20

21 Donihue C.M., Herrel A., Fabre A.-C., Kamath A., Geneva A.J., Schoener T.W., Kolbe J.J.,  
22  
23 Losos J.B. 2018. Hurricane-induced selection on the morphology of an island lizard. *Nature*  
24  
25 *560*:88–91. <https://doi.org/10.1038/s41586-018-0352-3>.  
26  
27  
28  
29  
30

31 Donihue C.M., Kowaleski A.M., Losos J.B., Algar A.C., Baeckens S., Buchkowski R.W.,  
32  
33 Fabre A.-C., Frank H.K., Geneva A.J., Reynolds R.G., Stroud J.T., Velasco J.A., Kolbe J.J.,  
34  
35 Mahler D.L., Herrel, A. 2020. Hurricane effects on Neotropical lizards span geographic and  
36  
37 phylogenetic scales. *Proceedings of the National Academy of Sciences of the United States of*  
38  
39 *America*, *117*:10429–10434. <https://doi.org/10.1073/pnas.2000801117>.  
40  
41  
42  
43  
44  
45

46 Dufour C.M., Donihue C.M., Losos J.B., Herrel A. 2019. Parallel increases in grip strength in  
47  
48 two species of *Anolis* lizards after a major hurricane on Dominica. *Journal of Zoology*  
49  
50 *309*:77–83. <https://doi.org/10.1111/jzo.12685>.  
51  
52  
53  
54  
55  
56  
57  
58  
59  
60  
61  
62  
63  
64  
65



Duméril A., Bibron G., Duméril A. 1854. *Alsophis rufiventris*. Published in: Garman, S. 1887.

On West Indian reptiles in the Museum of Comparative Zoology at Cambridge, Mass.

*Proceedings of the American Philosophical Society* 24:278–286.

Durso A.M., Willson J.D., Winne C.T. 2011. Needles in haystacks: estimating detection probability and occupancy of rare and cryptic snakes. *Biological Conservation* 144:1508-1515.

Efron B., Tibshirani R.J. 1993. An introduction to the bootstrap. *Monographs on Statistics and Applied Probability* 57:1-436.

Elsner J.B. 2006. Evidence in support of the climate change–Atlantic hurricane hypothesis. *Geophysical Research Letters* 33.

Fauth J.E., Crother B.I., Slowinski J.B. 1989. Elevational patterns of species richness, evenness, and abundance of the Costa Rican leaf-litter herpetofauna. *Biotropica*:178-185.

Fu C., Wang J., Pu Z., Zhang S., Chen H., Zhao B., Chen J., Wu J. 2007. Elevational gradients of diversity for lizards and snakes in the Hengduan Mountains, China. *Biodiversity Conservation* 16:707–726.

Garman S. 1887. On West Indian reptiles in the Museum of Comparative Zoology at Cambridge, Mass. *Proceedings of the American Philosophical Society* 24: 278–286.

Geoffroy Saint-Hilaire, É. 1818. *Herpestes javanicus*. In Species 2000 & ITIS Catalogue of

1  
2 Life: 2019, Catalogue of Life.  
3  
4  
5  
6

7 Gibbons J.W., Scott D.E., Ryan T.J., Buhlmann K.A., Tuberville T.D., Metts B.S., Greene  
8  
9 J.L., Mills T., Leiden Y., Poppy S., Winne C.T. 2000. The global decline of reptiles, déjà vu  
10  
11 amphibians. *BioScience* 50:653-666.  
12  
13  
14  
15

16  
17 Henderson R.W. 1992. Consequences of predator introductions and habitat destruction on  
18  
19 amphibians and reptiles in the post-Columbus West Indies. *Caribbean Journal of Science*  
20  
21 28:1-10.  
22  
23  
24  
25

26  
27 Henderson R.W., Sajdak R.A. 1996. Diets of West Indian racers (Colubridae: *Alsophis*):  
28  
29 composition and biogeographic implications. *Contributions to West Indian Herpetology: A*  
30  
31 *Tribute to Albert Schwartz*:327-338.  
32  
33  
34  
35

36  
37 Henderson R.W. 2004. Lesser Antillean snake faunas: Distribution, ecology, and conservation  
38  
39 concerns. *Oryx* 38:311-320.  
40  
41  
42  
43

44  
45 Herrera-Montes A., Brokaw N. 2010. Conservation value of tropical secondary forest: A  
46  
47 herpetofaunal perspective. *Biological Conservation* 143:1414-1422.  
48  
49  
50

51  
52 Hileman E.T., Powell R., Perry G., Mougey K., Thomas R., Henderson R.W. 2017.  
53  
54 Demography of the Puerto Rican Racer, *Borikenophis portoricensis* (Squamata: Dipsadidae),  
55  
56 on Guana Island, British Virgin Islands. *Journal of Herpetology* 51:454-460.  
57  
58  
59  
60  
61  
62  
63  
64  
65

1  
2 Lazell J.D., Jr. 1972. The anoles (Sauria, Iguanidae) of the Lesser Antilles. *Bulletin of the*  
3 *Museum of Comparative Zoology* 143:1-115.

4  
5  
6  
7 Linnaeus C. 1758. Systema naturae per regna tria naturae, secundum classes, ordines, genera,  
8 species, cum characteribus, differential, synonymis, locis, Tomus I. Editio decima, reformata.

9  
10  
11  
12  
13  
14 Lugo A.E. 2000. Effects and outcomes of Caribbean hurricanes in a climate change  
15 scenario. *Science of the Total Environment* 262:243-251.

16  
17  
18  
19  
20  
21 MacKenzie D.I., Nichols J.D., Royle J.A., Pollock K.H., Bailey L., Hines J.E. 2017  
22 Occupancy estimation and modeling: inferring patterns and dynamics of species occurrence.  
23 Elsevier, Amsterdam.

24  
25  
26  
27  
28  
29  
30  
31 Madden H., Van Andel T., Miller J., Stech M., Verdel K., Eggermont E. 2019. Vegetation  
32 associations and relative abundance of rodents on St. Eustatius, Caribbean  
33 Netherlands. *Global Ecology and Conservation* 20:p.e00743.

34  
35  
36  
37  
38  
39  
40  
41 Madden H., Eggermont E., Verdel K. 2020. Micro-and Macrohabitat Preferences of Invasive  
42 Rodents on St. Eustatius, Caribbean Netherlands. *Caribbean Journal of Science* 50:202-211.

43  
44  
45  
46  
47  
48  
49  
50  
51 Madden H. 2020. Nocturnal observation of *Alsophis rufiventris*. Natural History Notes.  
52 *Herpetological Review* 51.

53  
54  
55  
56  
57  
58  
59  
60  
61  
62  
63  
64  
65  
66  
67  
68  
69  
70  
71  
72  
73  
74  
75  
76  
77  
78  
79  
80  
81  
82  
83  
84  
85  
86  
87  
88  
89  
90  
91  
92  
93  
94  
95  
96  
97  
98  
99  
100  
101  
102  
103  
104  
105  
106  
107  
108  
109  
110  
111  
112  
113  
114  
115  
116  
117  
118  
119  
120  
121  
122  
123  
124  
125  
126  
127  
128  
129  
130  
131  
132  
133  
134  
135  
136  
137  
138  
139  
140  
141  
142  
143  
144  
145  
146  
147  
148  
149  
150  
151  
152  
153  
154  
155  
156  
157  
158  
159  
160  
161  
162  
163  
164  
165  
166  
167  
168  
169  
170  
171  
172  
173  
174  
175  
176  
177  
178  
179  
180  
181  
182  
183  
184  
185  
186  
187  
188  
189  
190  
191  
192  
193  
194  
195  
196  
197  
198  
199  
200  
201  
202  
203  
204  
205  
206  
207  
208  
209  
210  
211  
212  
213  
214  
215  
216  
217  
218  
219  
220  
221  
222  
223  
224  
225  
226  
227  
228  
229  
230  
231  
232  
233  
234  
235  
236  
237  
238  
239  
240  
241  
242  
243  
244  
245  
246  
247  
248  
249  
250  
251  
252  
253  
254  
255  
256  
257  
258  
259  
260  
261  
262  
263  
264  
265  
266  
267  
268  
269  
270  
271  
272  
273  
274  
275  
276  
277  
278  
279  
280  
281  
282  
283  
284  
285  
286  
287  
288  
289  
290  
291  
292  
293  
294  
295  
296  
297  
298  
299  
300  
301  
302  
303  
304  
305  
306  
307  
308  
309  
310  
311  
312  
313  
314  
315  
316  
317  
318  
319  
320  
321  
322  
323  
324  
325  
326  
327  
328  
329  
330  
331  
332  
333  
334  
335  
336  
337  
338  
339  
340  
341  
342  
343  
344  
345  
346  
347  
348  
349  
350  
351  
352  
353  
354  
355  
356  
357  
358  
359  
360  
361  
362  
363  
364  
365  
366  
367  
368  
369  
370  
371  
372  
373  
374  
375  
376  
377  
378  
379  
380  
381  
382  
383  
384  
385  
386  
387  
388  
389  
390  
391  
392  
393  
394  
395  
396  
397  
398  
399  
400  
401  
402  
403  
404  
405  
406  
407  
408  
409  
410  
411  
412  
413  
414  
415  
416  
417  
418  
419  
420  
421  
422  
423  
424  
425  
426  
427  
428  
429  
430  
431  
432  
433  
434  
435  
436  
437  
438  
439  
440  
441  
442  
443  
444  
445  
446  
447  
448  
449  
450  
451  
452  
453  
454  
455  
456  
457  
458  
459  
460  
461  
462  
463  
464  
465  
466  
467  
468  
469  
470  
471  
472  
473  
474  
475  
476  
477  
478  
479  
480  
481  
482  
483  
484  
485  
486  
487  
488  
489  
490  
491  
492  
493  
494  
495  
496  
497  
498  
499  
500  
501  
502  
503  
504  
505  
506  
507  
508  
509  
510  
511  
512  
513  
514  
515  
516  
517  
518  
519  
520  
521  
522  
523  
524  
525  
526  
527  
528  
529  
530  
531  
532  
533  
534  
535  
536  
537  
538  
539  
540  
541  
542  
543  
544  
545  
546  
547  
548  
549  
550  
551  
552  
553  
554  
555  
556  
557  
558  
559  
560  
561  
562  
563  
564  
565  
566  
567  
568  
569  
570  
571  
572  
573  
574  
575  
576  
577  
578  
579  
580  
581  
582  
583  
584  
585  
586  
587  
588  
589  
590  
591  
592  
593  
594  
595  
596  
597  
598  
599  
600  
601  
602  
603  
604  
605  
606  
607  
608  
609  
610  
611  
612  
613  
614  
615  
616  
617  
618  
619  
620  
621  
622  
623  
624  
625  
626  
627  
628  
629  
630  
631  
632  
633  
634  
635  
636  
637  
638  
639  
640  
641  
642  
643  
644  
645  
646  
647  
648  
649  
650  
651  
652  
653  
654  
655  
656  
657  
658  
659  
660  
661  
662  
663  
664  
665  
666  
667  
668  
669  
670  
671  
672  
673  
674  
675  
676  
677  
678  
679  
680  
681  
682  
683  
684  
685  
686  
687  
688  
689  
690  
691  
692  
693  
694  
695  
696  
697  
698  
699  
700  
701  
702  
703  
704  
705  
706  
707  
708  
709  
710  
711  
712  
713  
714  
715  
716  
717  
718  
719  
720  
721  
722  
723  
724  
725  
726  
727  
728  
729  
730  
731  
732  
733  
734  
735  
736  
737  
738  
739  
740  
741  
742  
743  
744  
745  
746  
747  
748  
749  
750  
751  
752  
753  
754  
755  
756  
757  
758  
759  
760  
761  
762  
763  
764  
765  
766  
767  
768  
769  
770  
771  
772  
773  
774  
775  
776  
777  
778  
779  
780  
781  
782  
783  
784  
785  
786  
787  
788  
789  
790  
791  
792  
793  
794  
795  
796  
797  
798  
799  
800  
801  
802  
803  
804  
805  
806  
807  
808  
809  
810  
811  
812  
813  
814  
815  
816  
817  
818  
819  
820  
821  
822  
823  
824  
825  
826  
827  
828  
829  
830  
831  
832  
833  
834  
835  
836  
837  
838  
839  
840  
841  
842  
843  
844  
845  
846  
847  
848  
849  
850  
851  
852  
853  
854  
855  
856  
857  
858  
859  
860  
861  
862  
863  
864  
865  
866  
867  
868  
869  
870  
871  
872  
873  
874  
875  
876  
877  
878  
879  
880  
881  
882  
883  
884  
885  
886  
887  
888  
889  
890  
891  
892  
893  
894  
895  
896  
897  
898  
899  
900  
901  
902  
903  
904  
905  
906  
907  
908  
909  
910  
911  
912  
913  
914  
915  
916  
917  
918  
919  
920  
921  
922  
923  
924  
925  
926  
927  
928  
929  
930  
931  
932  
933  
934  
935  
936  
937  
938  
939  
940  
941  
942  
943  
944  
945  
946  
947  
948  
949  
950  
951  
952  
953  
954  
955  
956  
957  
958  
959  
960  
961  
962  
963  
964  
965  
966  
967  
968  
969  
970  
971  
972  
973  
974  
975  
976  
977  
978  
979  
980  
981  
982  
983  
984  
985  
986  
987  
988  
989  
990  
991  
992  
993  
994  
995  
996  
997  
998  
999  
1000

Eustatius, and a review of the genus in the Caribbean. *bioRxiv*.

<https://doi.org/10.1101/2021.07.05.451169>.

Maley A. 2004. Species profile: Red-bellied Racer (*Alsophis rufiventris*). *Iguana* 11:147.

Maley A.J., Savit A.Z., Heinz H.M., Powell R., Henderson R.W. 2006. *Alsophis rufiventris*. *Catalogue of American Amphibians and Reptiles (CAAR)*.

Marques T.A., Thomas L., Fancy S.G., Buckland S.T. 2007. Improving estimates of bird density using multiple-covariate distance sampling. *The Auk* 124(4):1229-1243.

Mayani-Parás F., Botello F., Castañeda S., Sánchez-Cordero V. 2019. Impact of habitat loss and mining on the distribution of endemic species of amphibians and reptiles in Mexico. *Diversity* 11:210.

McDonald T., Carlisle J., McDonald A. 2019. Rdistance: Distance-Sampling Analyses for Density and Abundance Estimation. R package version 2.1.3. <https://CRAN.R-project.org/package=Rdistance>.

Meredith M. 2020. wqid: Quick and Dirty Estimates for Wildlife Populations. R package version 0.3.0. Available from <https://CRAN.R-project.org/package=wqid>.

Mittermeier R.A., Robles G.R., Hoffman M., Pilgrim J., Brooks T., Mittermeier C.G.,

Lamoreux J., da Fonseca G.A.B. 2004. Hotspots revisited: Earth's biologically richest and most threatened terrestrial ecoregions. CEMEX, Mexico DF.

Moser D., Lenzner B., Weigelt P., Dawson W., Kreft H., Pergl J., Pyšek P., van Kleunen M., Winter M., Capinha C., Cassey P. 2018. Remoteness promotes biological invasions on islands worldwide. *Proceedings of the National Academy of Sciences* 115:9270-9275.

Parker H.W. 1933. Some amphibians and reptiles from the Lesser Antilles. *Annals of the Magazine of Natural History* 11:151–158.

Powell R. 2004. Conservation of iguanas (*Iguana delicatissima* and *I. iguana*) in the Lesser Antilles. *Iguana* 11:238-246.

Powell R., Henderson R.W. 2005. Conservation status of Lesser Antillean reptiles. *Iguana* 12:62-77.

Powell R. 2006. Conservation of the herpetofauna on the Dutch Windward Islands: St. Eustatius, Saba, and St. Maarten. *Applied Herpetology* 3:293-306.

Questel K. 2021. *Alsophis rijgersmaei* Cope, 1869 (Squamata: Dipsadidae) sur l'île de Saint-Barthélemy. Agence Territoriale de l'Environnement St. Barthélemy.

1 Reinhardt J., Lütken C.F. 1862. Bidrag tii det vestindiske Öriges og navnliggen tii de dansk-  
2 vestindiske Oers Herpetologie. *Videnskabelige meddelelser fra den Naturhistoriske forening i*  
3  
4 *Kjöbenhavn*:153-291.  
5

6  
7  
8  
9 Ricklefs R.E., Lovette I.J. 1999. The roles of island area per se and habitat diversity in the  
10 species–area relationships of four Lesser Antillean faunal groups. *Journal of Animal*  
11  
12 *Ecology* 68:1142-1160.  
13  
14  
15

16  
17  
18  
19 Rodda G.H., Perry G., Rondaeu R.J., Lazell J. 2001. The densest terrestrial vertebrate.  
20  
21 *Journal of Tropical Ecology* 17:331–338.  
22  
23

24  
25  
26 Rojer A. 1997. *Biological inventory of Saba*. Curaçao, Netherlands Antilles: Carmabi  
27  
28 Foundation.  
29  
30

31  
32  
33 Ross T., Williams R.J. 2012. Population assessment and conservation status of the Saint Lucia  
34 racer, *Liophis ornatus*. November - December 2011. Unpubl. report to Durrell Wildlife  
35  
36 Conservation Trust, Saint Lucia Forestry Department, Saint Lucia National Trust and Fauna  
37  
38 & Flora International.  
39  
40  
41

42  
43  
44 Sajdak R.A., Henderson R.W. 1991. Status of West Indian racers in the Lesser Antilles. *Oryx*  
45  
46 25:33–38.  
47  
48

49  
50  
51 Staats C.M., Schall J.J. 1996. The Saban Anole: the story of a unique lizard on a small  
52  
53 Caribbean island. Saba Conservation Foundation, Saba, Netherlands Antilles.  
54  
55

56  
57 Stoffers A.L. 1956. *The vegetation of the Netherlands Antilles* (No. 135). Kemink.  
58  
59  
60  
61  
62  
63  
64  
65

1  
2  
3  
4  
5  
6  
7  
8  
9  
10  
11  
12  
13  
14  
15  
16  
17  
18  
19  
20  
21  
22  
23  
24  
25  
26  
27  
28  
29  
30  
31  
32  
33  
34  
35  
36  
37  
38  
39  
40  
41  
42  
43  
44  
45  
46  
47  
48  
49  
50  
51  
52  
53  
54  
55  
56  
57  
58  
59  
60  
61  
62  
63  
64  
65

Terpstra M., Van der Woude E., Wulf K., van Rijn J., Debrot A.O., 2015. *Monitoring the effect of cat removal on reproductive success in Red-billed Tropicbird colonies on Saba, 2013-2014: first season of results* (No. C103/15). IMARES.

Urban M.C. 2015. Accelerating extinction risk from climate change. *Science* 348:571-573.

Veenenbos J.S. 1955. A soil and land capability survey of St. Maarten, St. Eustatius, and Saba. Publ. Found. Scientific Research Suriname Netherlands Antilles, Utrecht, The Netherlands. 11, 94 pp., ill., map

Webster P.J., Holland G.J., Curry J.A., Chang H.R. 2005. Changes in tropical cyclone number, duration, and intensity in a warming environment. *Science* 309:1844-1846.

## FIGURES

1  
2  
3  
4  
5 **Figure 1.** Distribution of *Alsophis rufiventris* on the St. Christopher and Saba banks. Dots  
6  
7 indicate locality records, X's mark extirpated populations on St. Kitts and Nevis, and red stars  
8  
9 mark fossil localities (adapted from Maley et al., 2006). Red arrow indicates the location of  
10  
11 Saba.  
12

13  
14  
15  
16  
17 **Figure 2.** Map of Saba showing vegetation types (M1 – M8) and line transects (red lines).  
18  
19 The remaining codes stand for A = Airport, C= Cliffs, U = Urbanized areas (adapted from de  
20  
21 Freitas et al., 2016).  
22

23  
24  
25  
26  
27 **Figure 3.** Occupancy ( $\hat{\psi}$ ) estimates of *Alsophis rufiventris* per habitat based on transect  
28  
29 surveys conducted in 2021 on Saba, Caribbean Netherlands. M1 (*Heliconia-Charianthus*  
30  
31 Mountains), M2 (*Philodendron-Marcgravia* Mountains), M3 (*Philodendron-Inga*  
32  
33 Mountains), M4 (*Swietenia* Mountains), M6 (*Coccoloba-Inga* Mountains), and M7 (*Aristida-*  
34  
35 *Bothriochloa* Mountains).  
36  
37  
38  
39  
40

41  
42 **Figure 4.** Occupancy ( $\hat{\psi}$ ) estimates of *Alsophis rufiventris* in relation to elevation (m) based  
43  
44 on transect surveys conducted in 2021 on Saba, Caribbean Netherlands.  
45  
46  
47

48  
49 **Figure 5.** Lambda ( $\hat{\lambda}$ ) estimates of *Alsophis rufiventris* per habitat based on transect surveys  
50  
51 conducted in 2021 on Saba, Caribbean Netherlands. M1 (*Heliconia-Charianthus* Mountains),  
52  
53 M2 (*Philodendron-Marcgravia* Mountains), M3 (*Philodendron-Inga* Mountains), M4  
54  
55 (*Swietenia* Mountains), M6 (*Coccoloba-Inga* Mountains), and M7 (*Aristida-Bothriochloa*  
56  
57 Mountains).  
58  
59  
60  
61  
62  
63  
64  
65



1  
2 **Figure 6.** Lambda ( $\hat{\lambda}$ ) estimates of *Alsophis rufiventris* in relation to elevation (m) based on  
3  
4 transect surveys conducted in 2021 on Saba, Caribbean Netherlands.  
5  
6  
7

8  
9 **Figure 7.** Cat predation of *Alsophis rufiventris* on Saba, Caribbean Netherlands (photos  
10  
11 courtesy of Bart Noort).  
12  
13  
14  
15  
16  
17  
18  
19  
20  
21  
22  
23  
24  
25  
26  
27  
28  
29  
30  
31  
32  
33  
34  
35  
36  
37  
38  
39  
40  
41  
42  
43  
44  
45  
46  
47  
48  
49  
50  
51  
52  
53  
54  
55  
56  
57  
58  
59  
60  
61  
62  
63  
64  
65



Click here to access/download

**Cover Letter**

Letter to editor SA JH Madden and Mielke Nov  
2021.docx



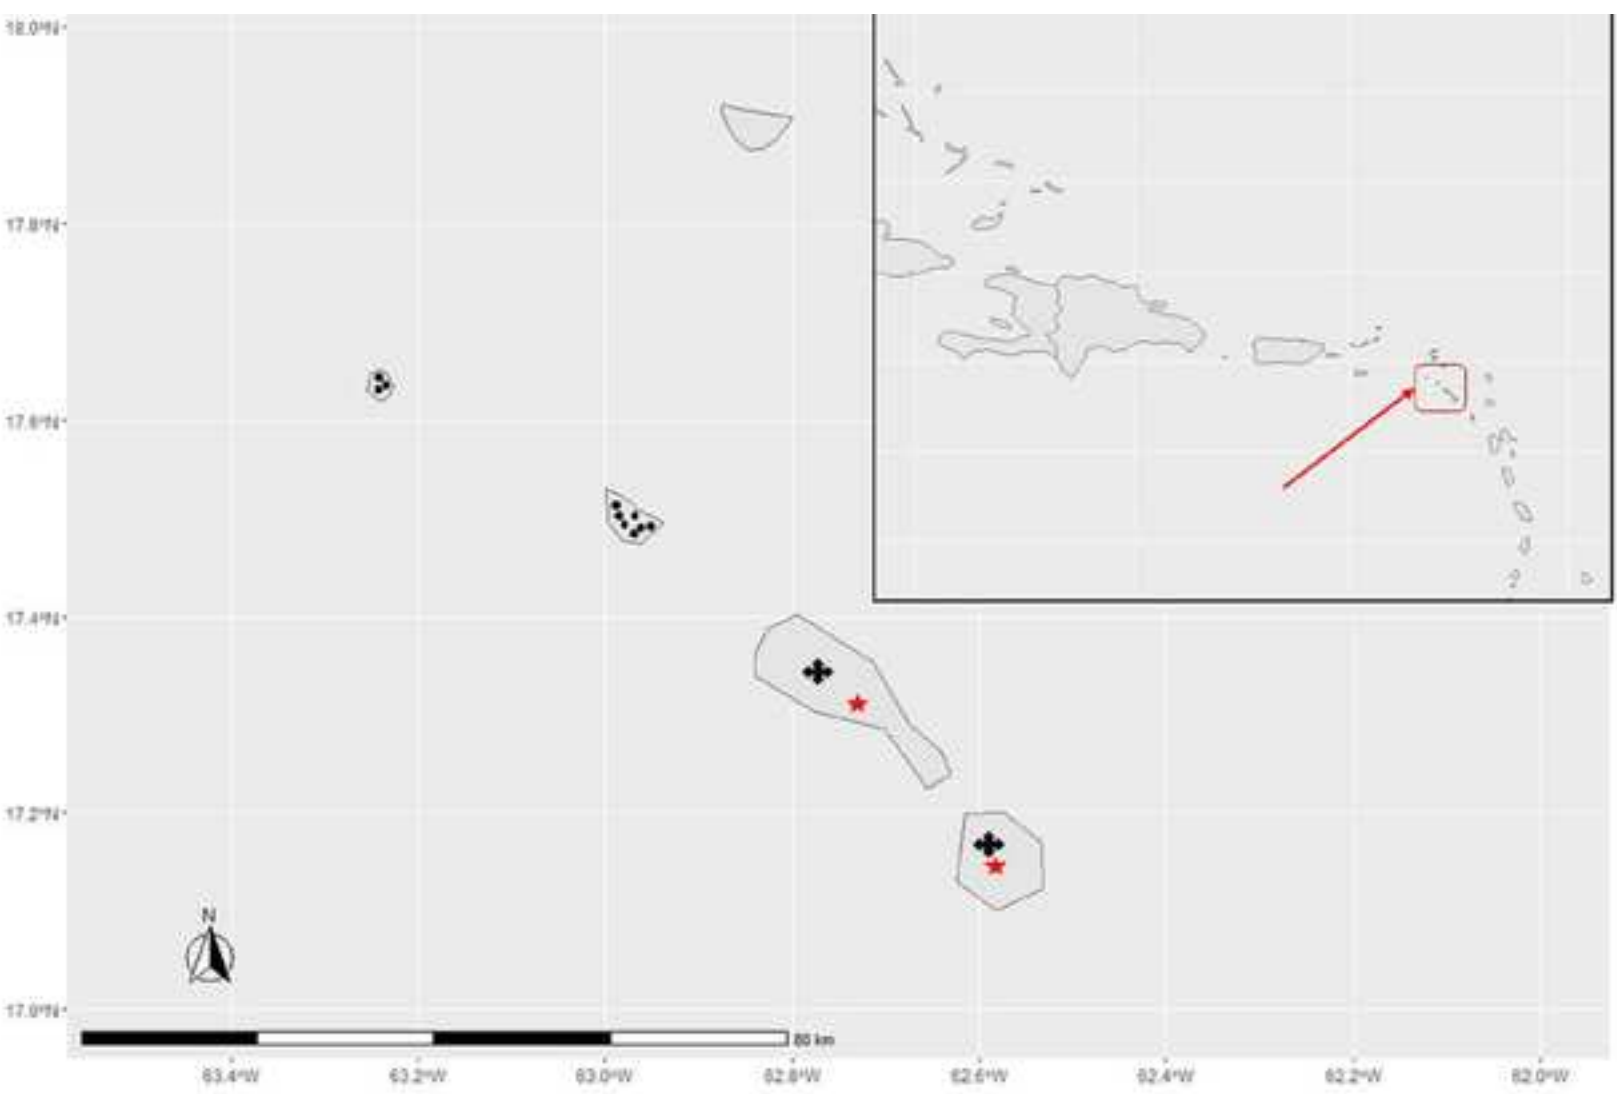

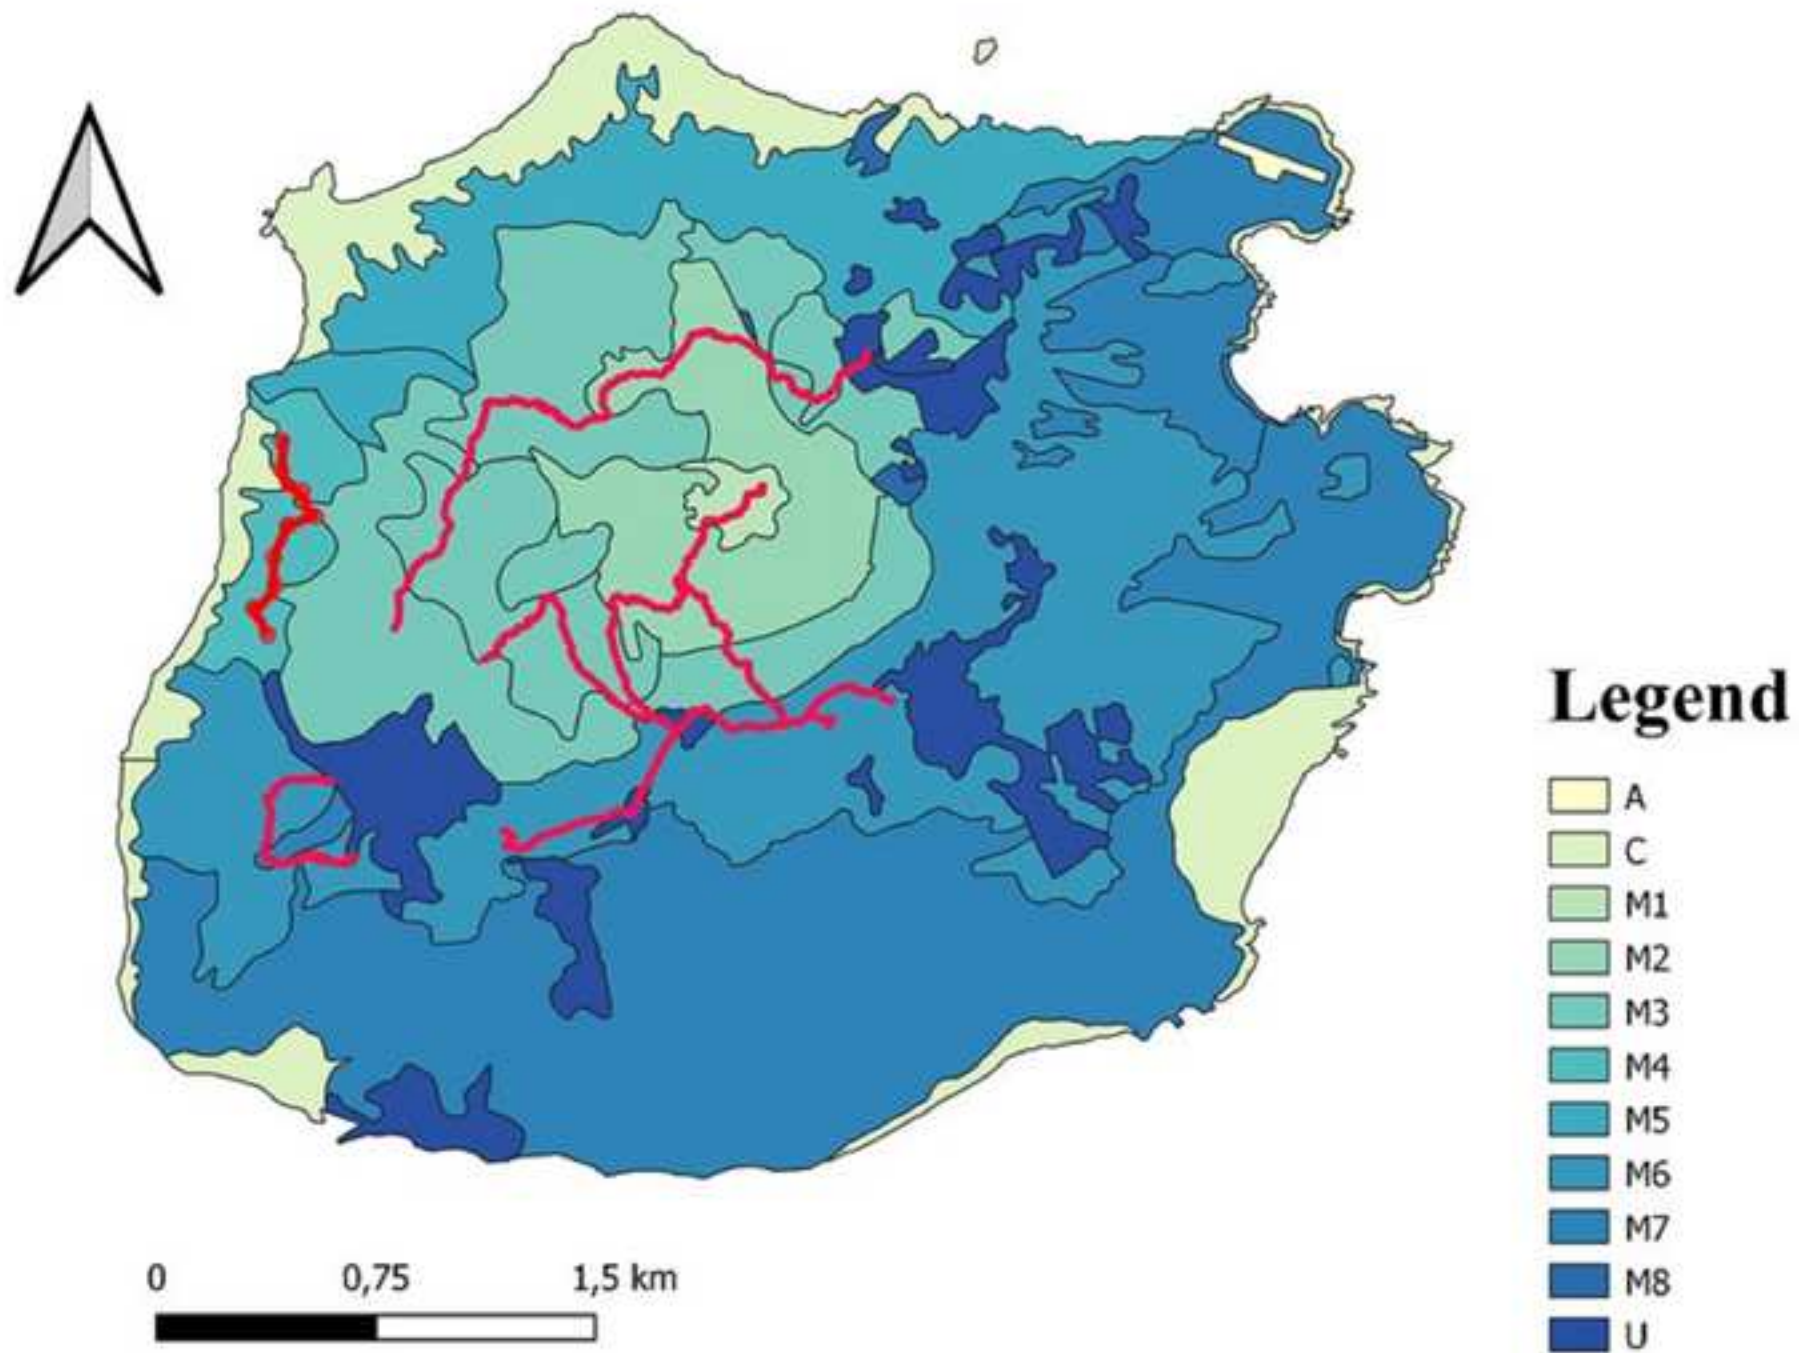

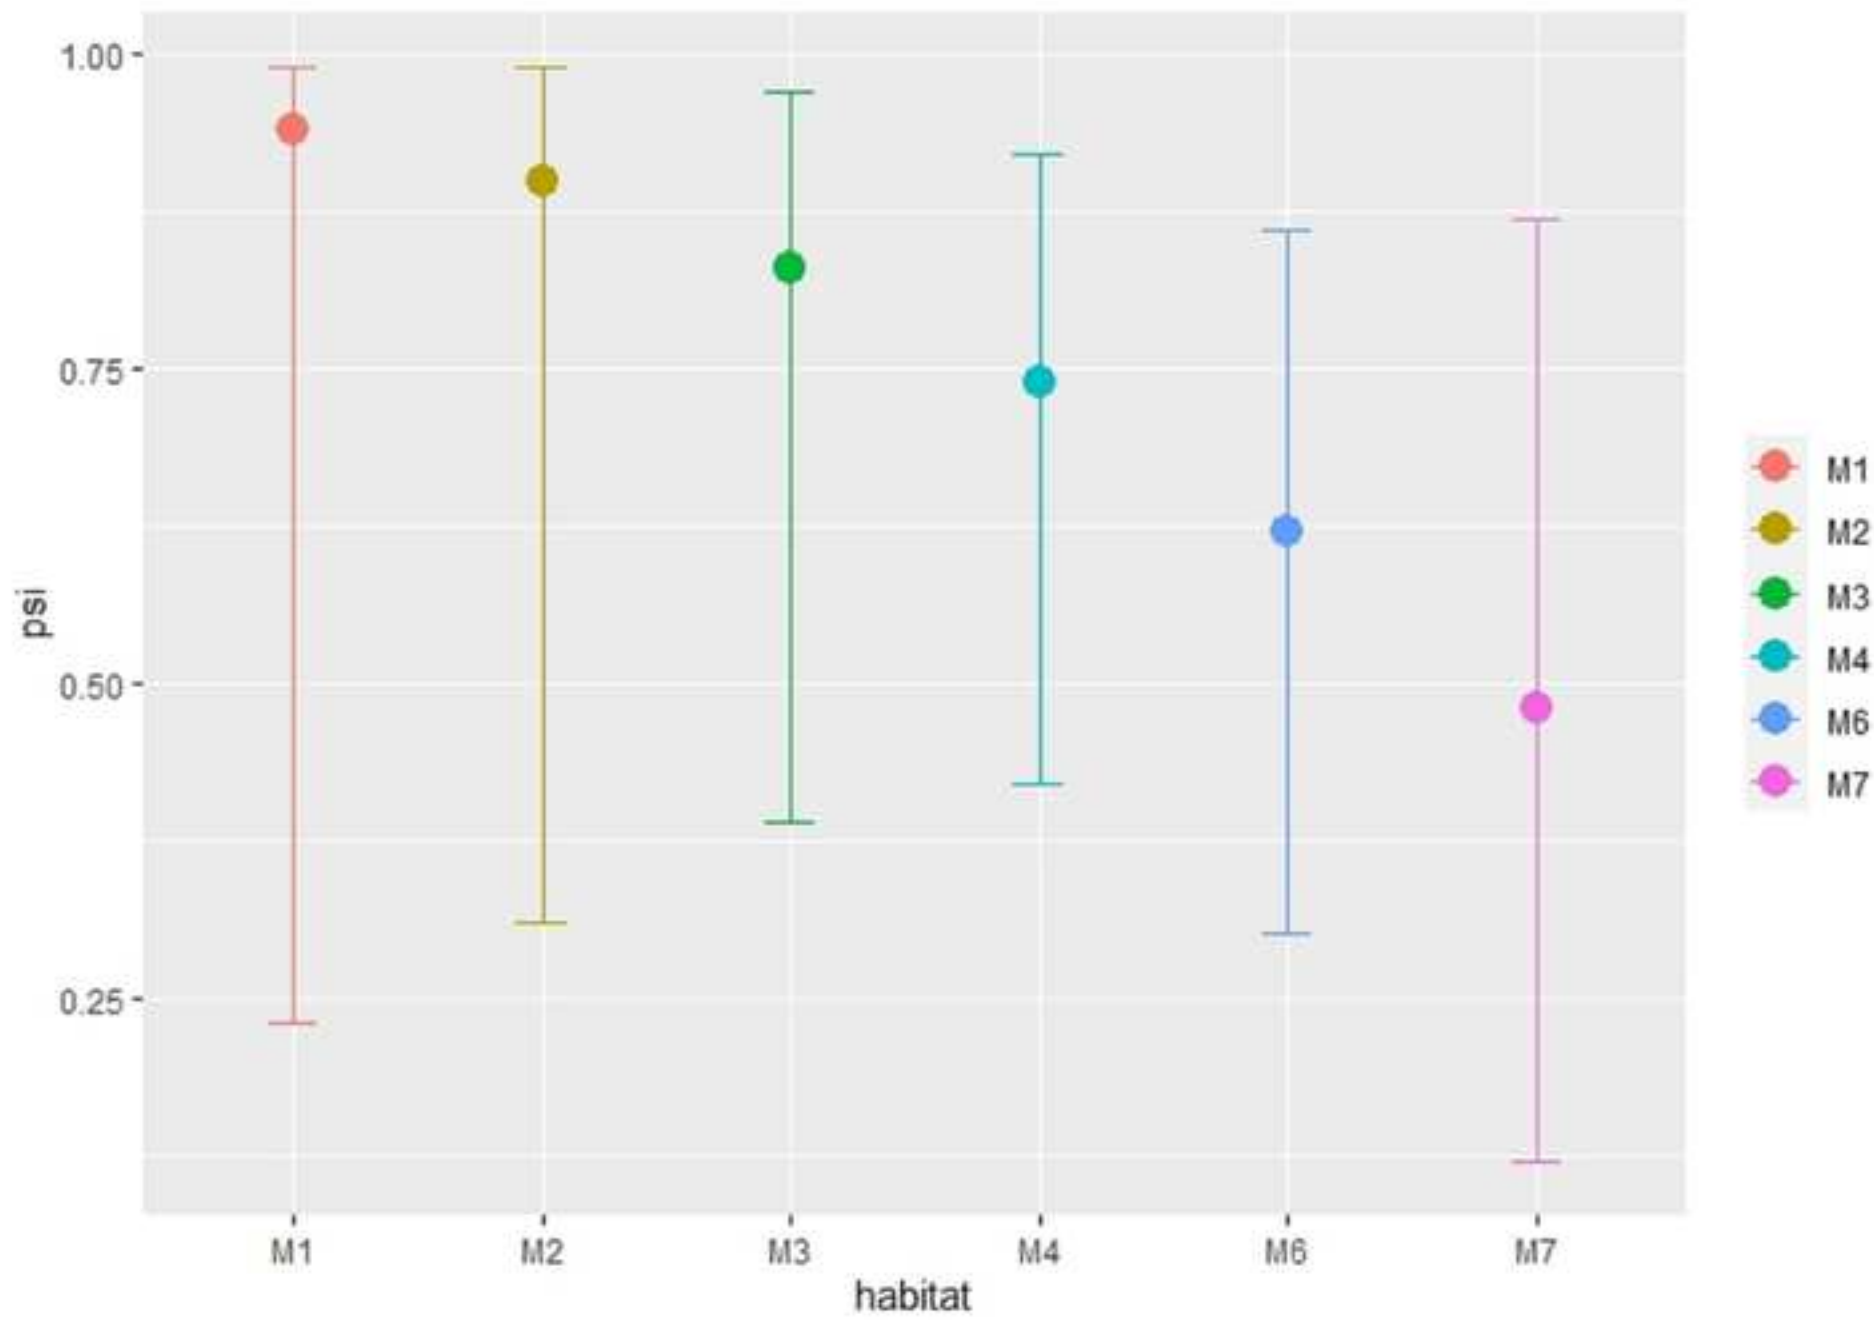

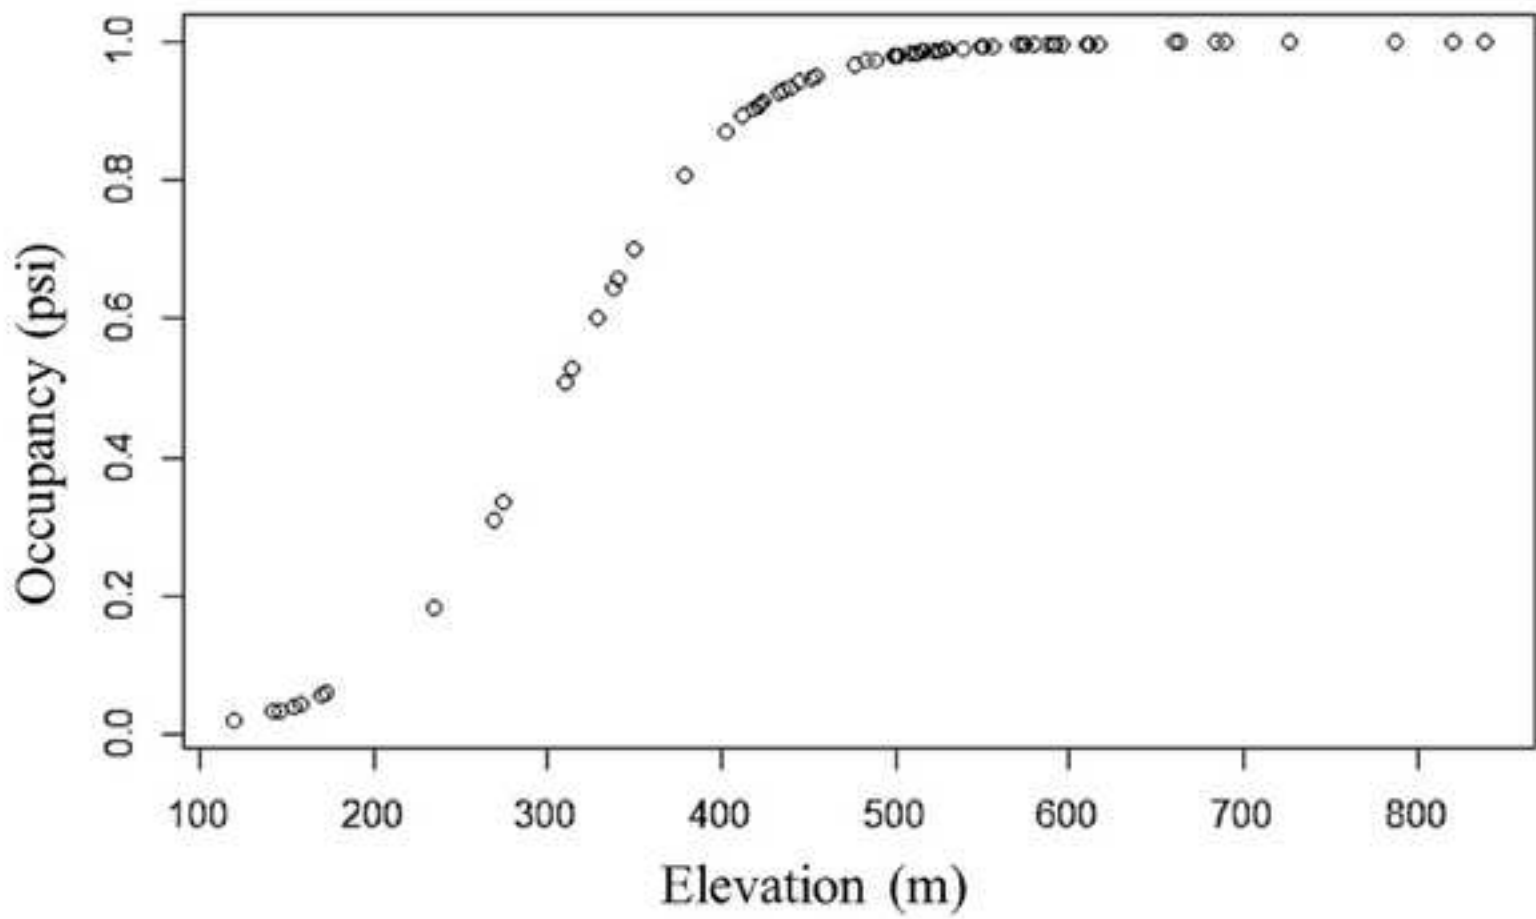

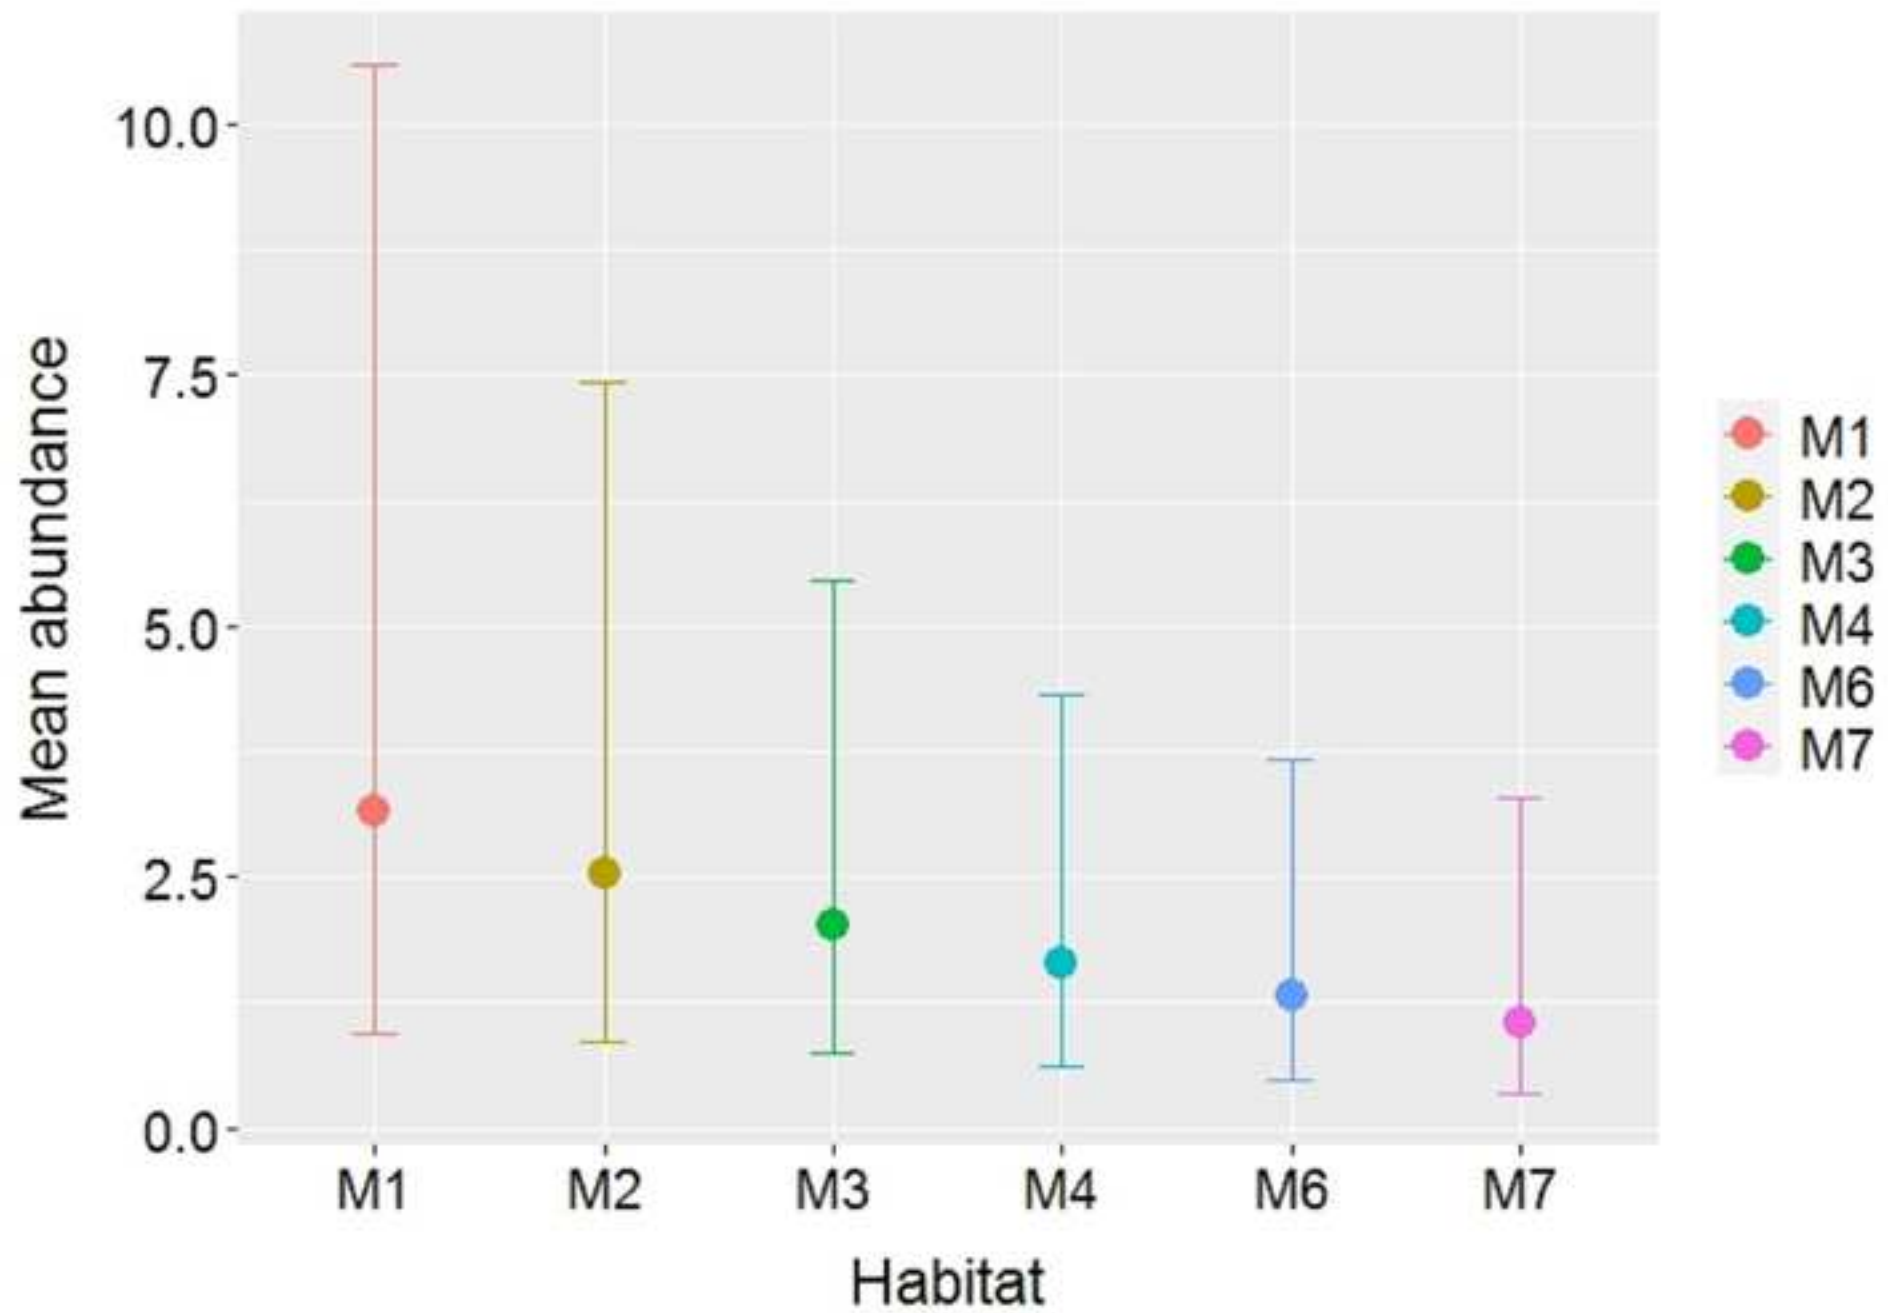

Figure 6

[Click here to access/download;Figure;Figure 6 abundance elevation\\_highres.jpg](#)

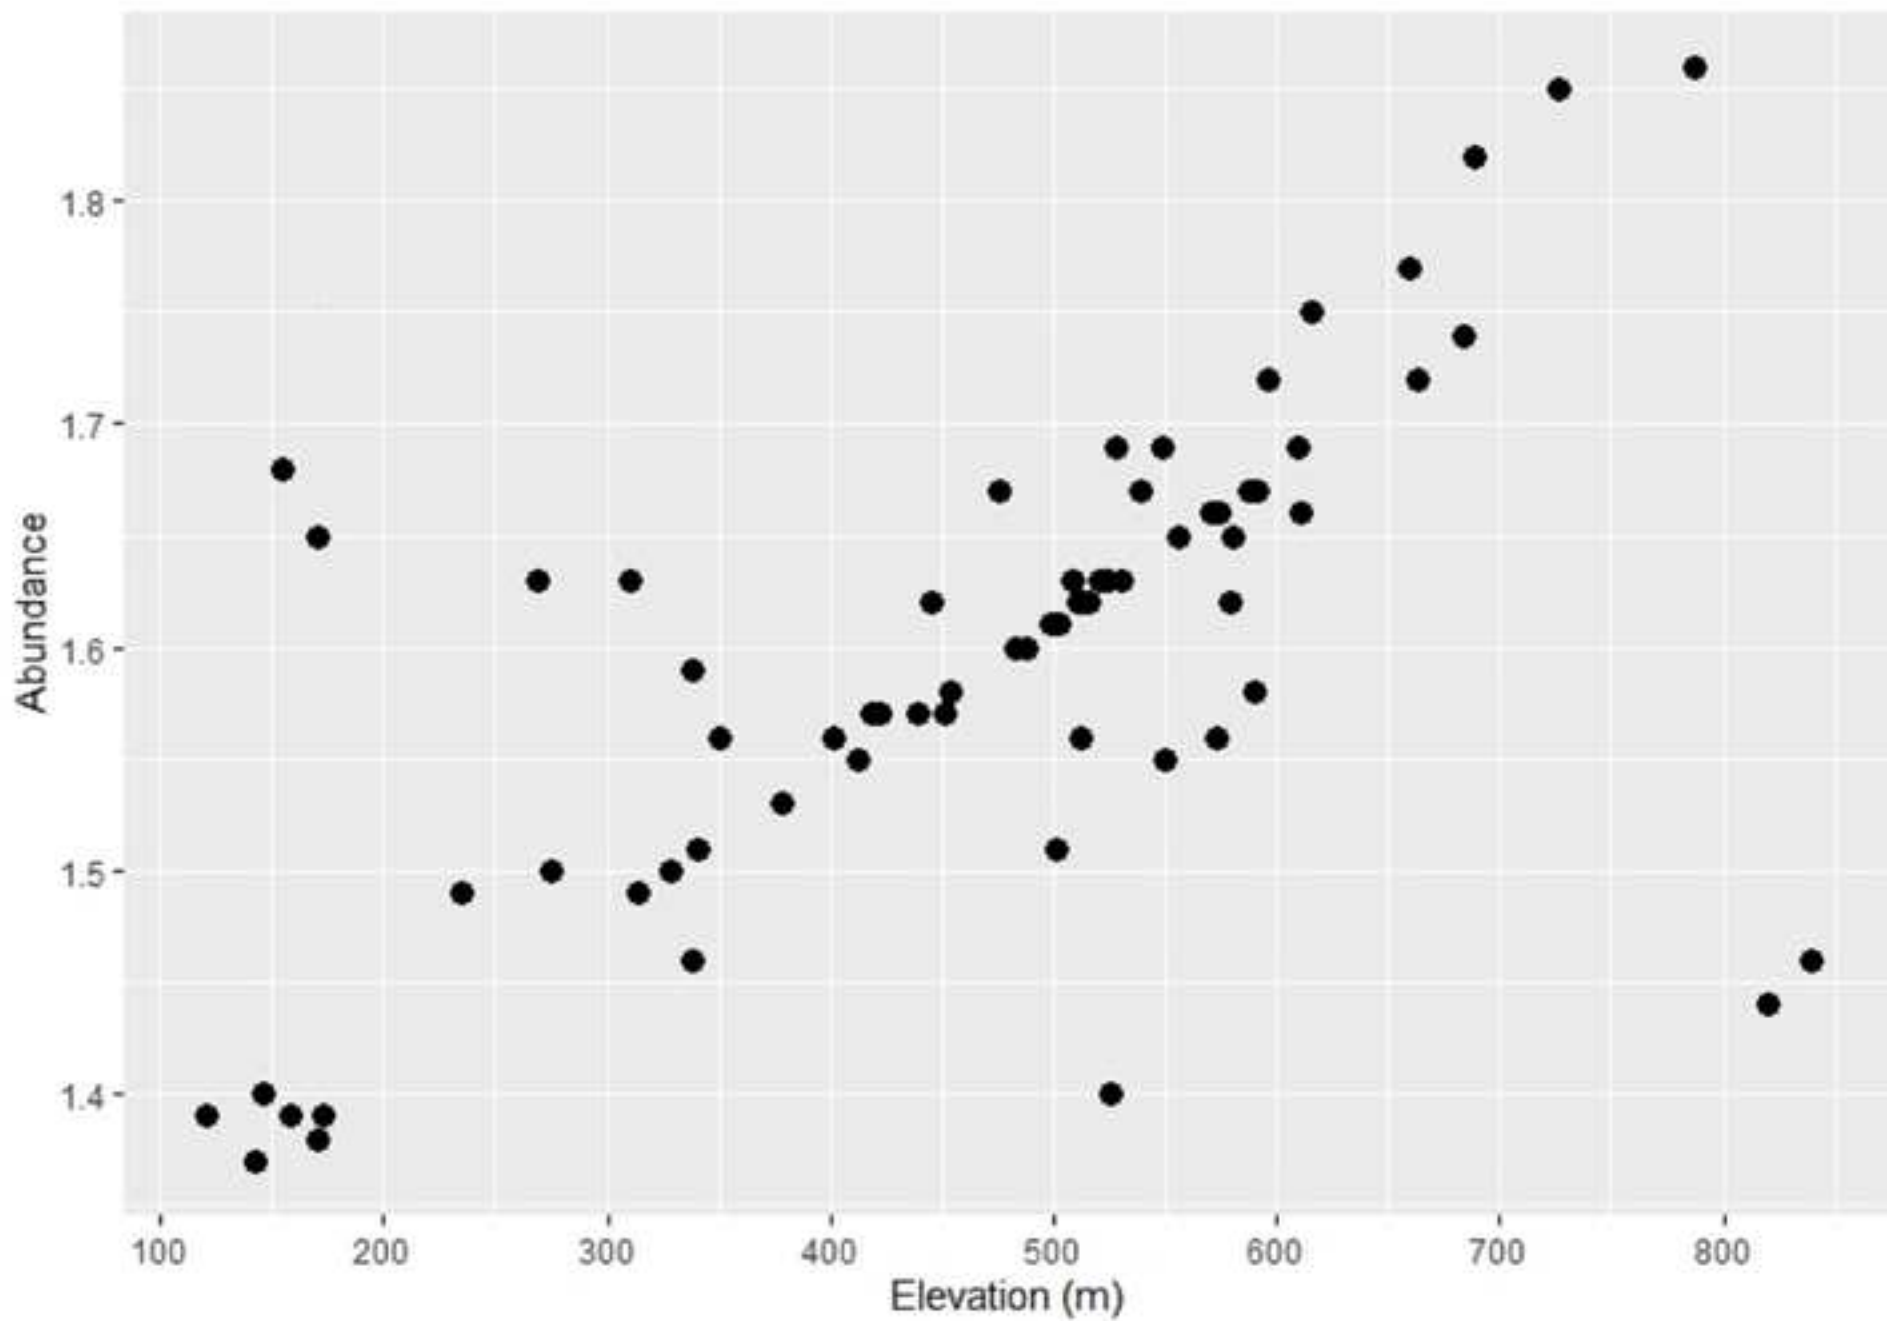



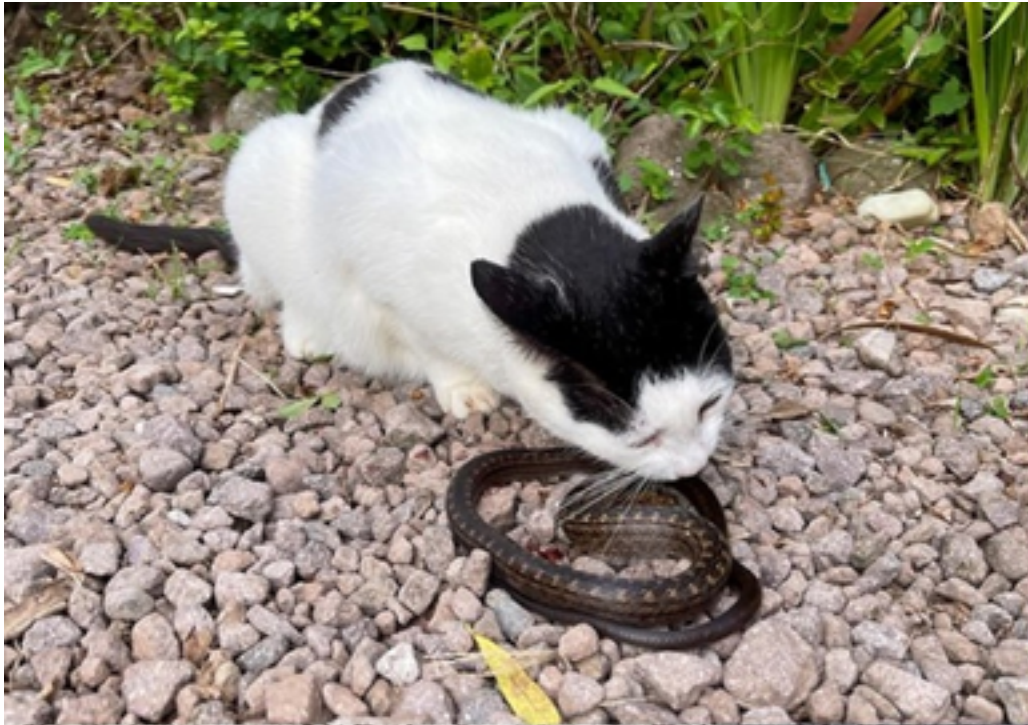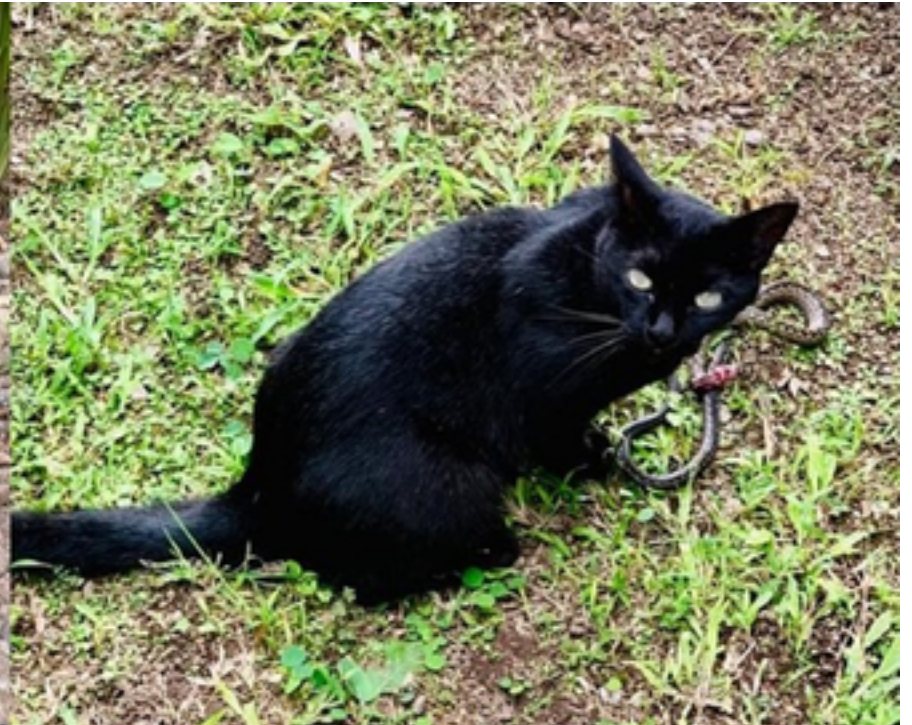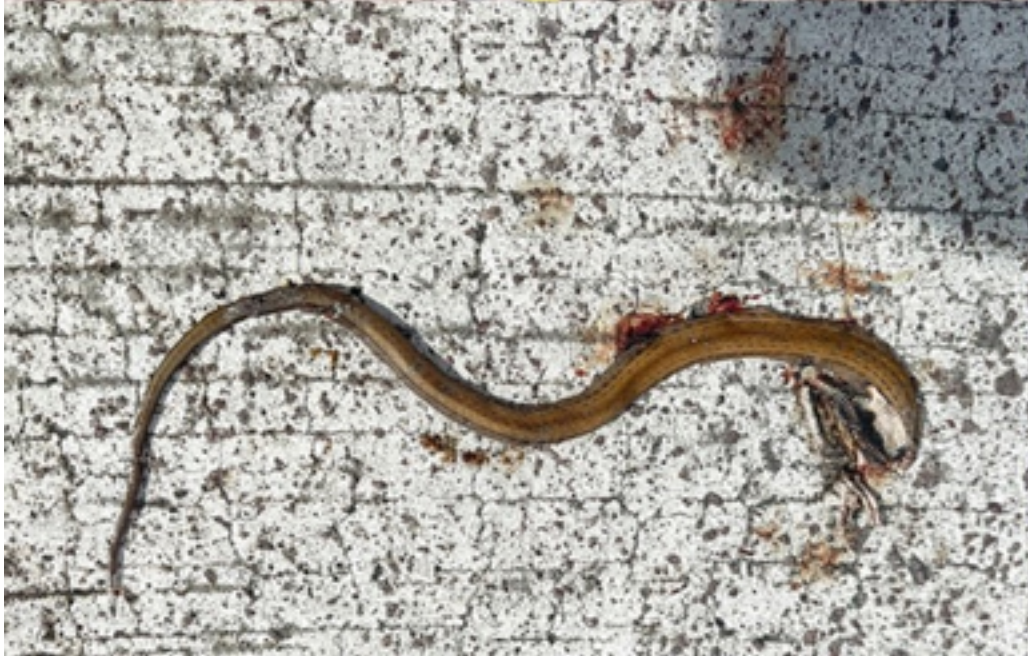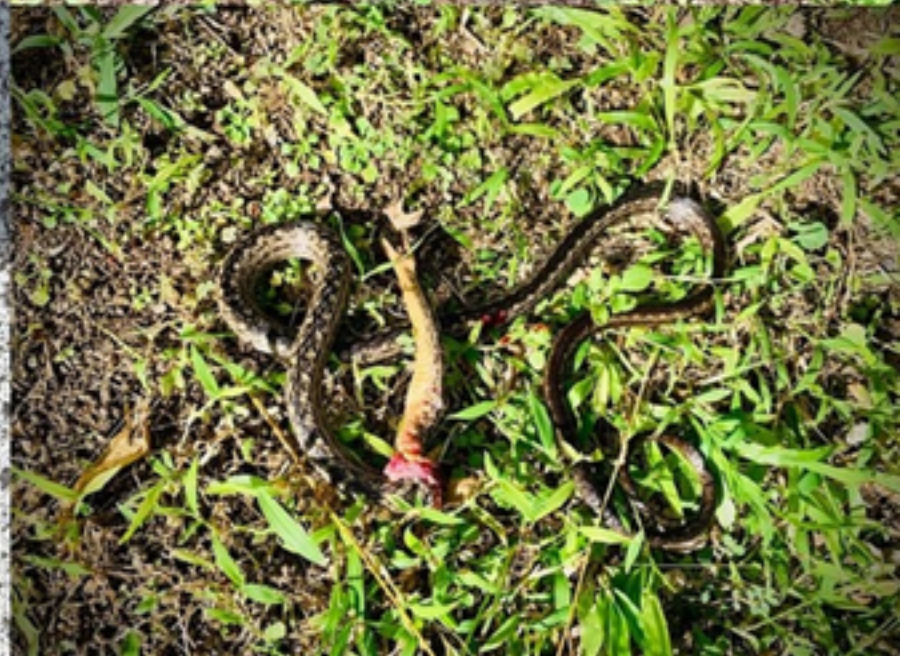

Source: https://www.biorxiv.org/content/10.1101/2021.11.15.468688v1.full.pdf
